# Supplementary material for: Automated generation of discharge summaries: leveraging large language models with clinical data
Source: Springer Nature journal article supplement (doi:10.1038/s41598-025-01618-7), 2025-05-12
Supplement: MOESM1 [file 41598_2025_1618_MOESM1_ESM.pdf]

## Supplementary Materials

### Data Schema

Table 1, 2, 3 and 4 show the data schema. The names of the data items are provided in English and German. An example for each item is provided in German only.

Table 1: Data Scheme: General Information

| <b>Data Item [English]</b>               | <b>Data Item [German]</b>                       | <b>Example [German]</b>                                                                                                                                                                                                                                             |
|------------------------------------------|-------------------------------------------------|---------------------------------------------------------------------------------------------------------------------------------------------------------------------------------------------------------------------------------------------------------------------|
| Gender                                   | Geschlecht                                      | Männlich                                                                                                                                                                                                                                                            |
| Date of Birth                            | Geburtsdatum                                    | 01.01.2033                                                                                                                                                                                                                                                          |
| Body weight & height                     | Körpergewicht & Körpergröße                     | 171cm, 73kg                                                                                                                                                                                                                                                         |
| Pre-existing conditions                  | Vorerkrankungen                                 | Arterielle Hypertonie, COPD                                                                                                                                                                                                                                         |
| Diabetes                                 | Diabetes                                        | Diabetes Mellitus, liegt vor; Einnahme oraler Antidiabetika                                                                                                                                                                                                         |
| Existing Changes                         | Vorliegende Veränderungen                       | Uterusmyom liegt vor                                                                                                                                                                                                                                                |
| Extrapaneatic tumour diseases            | Extrapankreatische Tumorerkrankungen            | Vorliegen extrapankreatische Tumorerkrankungen: Lungenkrebs: Therapie: Chemotherapie, Zeitpunkt: 01/2033                                                                                                                                                            |
| Previous abdominal extrapaneatic surgery | Vorhergehende abdominelle extrapankreatische OP | Vorgehende abdominelle extrapankreatische OP liegt vor                                                                                                                                                                                                              |
| Family history pancreas                  | Familienanamnese Pankreas                       | Familienanamnese: Chronische Pankreatitis liegt vor: Betroffene Familienmitglieder: Mutter                                                                                                                                                                          |
| Family history cancer                    | Familienanamnese Krebs                          | Familienanamnese: Extrapankreatische Krebserkrankungen: Lungenkrebs liegt vor: Betroffene Familienmitglieder: Onkel                                                                                                                                                 |
| Nicotine & Alcohol                       | Nikotin & Alkohol                               | Raucherstatus: Ehemaliger Raucher: Aufgehört am: 01/2033, Anzahl Jahre: 40, Zigaretten pro Tag: 15<br>Alkoholkonsum: Häufigkeit: Aufgehört seit: 01/2033, Häufigkeit Konsum vor Aufhören: Gelegentlicher Konsum, Übermäßiger Alkoholkonsum seit 01/2033 bis 11/2033 |

|                                   |                                     |                                                                                                                                                             |
|-----------------------------------|-------------------------------------|-------------------------------------------------------------------------------------------------------------------------------------------------------------|
| State of health & quality of life | Gesundheitszustand & Lebensqualität | Gesundheitszustand in der letzten Woche: 3 (1=sehr schlecht, 7=ausgezeichnet);<br>Lebensqualität in der letzten Woche: 5 (1=sehr schlecht, 7=ausgezeichnet) |
|-----------------------------------|-------------------------------------|-------------------------------------------------------------------------------------------------------------------------------------------------------------|

Table 2: Data Scheme: Before Surgery

| <b>Data Item [English]</b>                  | <b>Data Item [German]</b>                   | <b>Example [German]</b>                                                                                                                                                        |
|---------------------------------------------|---------------------------------------------|--------------------------------------------------------------------------------------------------------------------------------------------------------------------------------|
| Reason for visit<br>(pancreas consultation) | Grund des Besuchs<br>(Pankreassprechstunde) | Erstvorstellung; akute Pankreatitis,                                                                                                                                           |
| Recurrence                                  | Rezidiv                                     | Rezidiv festgestellt am 01.01.2033                                                                                                                                             |
| Date of initial diagnosis                   | Datum Erstdiagnose                          | 01.01.2033                                                                                                                                                                     |
| Suspected diagnosis                         | Verdachtsdiagnose                           | PDAC                                                                                                                                                                           |
| Histologically confirmed diagnosis          | Histologisch gesicherte Diagnose            | Diagnose histologisch gesichert: Material: Metastasen-Probenentnahme, Befund: PDAC                                                                                             |
| Weight loss in weeks                        | Gewichtsverlust in Wochen                   | 7 kg in 3 Wochen                                                                                                                                                               |
| Pain history                                | Schmerzanamnese                             | Chronische Schmerzen liegen vor:<br>Schmerzcharakter: Leichte Schmerzen,<br>Schmerzverlauf: Rezidivierend, Schmerz-<br>frequenz: Wöchentlich, Schmerzmedika-<br>tion: Morphium |
| Digestion                                   | Verdauung                                   | Anzahl Stuhlgänge pro Tag: 3, Erbrechen<br>liegt vor                                                                                                                           |
| Pancreatitis (acute & chronic)              | Pankreatitis (akut & chronisch)             | Chornische Pankreatitis liegt vor seit<br>01.01.2033                                                                                                                           |
| Jaundice & ERCP                             | Ikterus & ERCP                              | Ikterus liegt vor seit 01.01.2033                                                                                                                                              |
| Laboratory values                           | Laborwerte                                  | Bilirubin gesamt: 1.16 mg/dl: Wert erhöht                                                                                                                                      |
| Previous pancreatic surgery                 | Vorhergehende PankreasOP                    | Vorhergehende Pankreas-OP: DHC<br>Stent Einlage, Datum der OP:<br>01.01.2033                                                                                                   |

|                                                  |                                             |                                                                                                                                                           |
|--------------------------------------------------|---------------------------------------------|-----------------------------------------------------------------------------------------------------------------------------------------------------------|
| Previous therapy (chemo)                         | Vorausgegangene Therapie (Chemo)            | Präoperative Behandlung: Gallengangss-<br>tent                                                                                                            |
| Preoperative treatment                           | Präoperative Behandlung                     |                                                                                                                                                           |
| Preoperative bile duct drainage                  | Präoperative Gallengangsdrainage            | Präoperative Gallengangsdrainage<br>gelegt                                                                                                                |
| Radiological findings of the suspected diagnosis | Radiologischer Befund der Verdachtsdiagnose | Radiologischer Befund der Verdachtsdiagnose: Duktales Adenokarzinom des Pankreas (PDAC) / maligne Pankreastumoren, Resezierbarkeit des Tumors: Resektabel |
| Other radiological findings                      | Sonstige radiologische Befunde              | Sonstige radiologische Befunde: Zeichen einer akuten Pankreatitis                                                                                         |
| Treatment recommendation                         | Therapieempfehlung                          | [Freitext]                                                                                                                                                |

Table 3: Data Scheme: During Surgery

| <b>Data Item [English]</b>                                           | <b>Data Item [German]</b>                                        | <b>Example [German]</b>                                                                 |
|----------------------------------------------------------------------|------------------------------------------------------------------|-----------------------------------------------------------------------------------------|
| Date of admission                                                    | Aufnahmedatum                                                    | 01.01.2033                                                                              |
| Date of surgery                                                      | OP-Datum                                                         | 01.01.2033                                                                              |
| Pancreatic disease                                                   | Pankreaserkrankung                                               | PDAC                                                                                    |
| Extent of surgery                                                    | OP-Ausmaß                                                        | Art der OP: Totale Pankreatektomie, OP wurde abgebrochen: Grund: Metastasen             |
| Surgery extension                                                    | OP-Erweiterung                                                   | OP wurde erweitert: Zusätzliche Leberresektion durchgeführt                             |
| Intraop drains (incl. date of removal)                               | Intraop-Drainagen (inkl. Entfernungsdatum)                       | Intraoperative Drainagen: Spüldrainage: Eingelegt am 01.01.2033, entfernt am 11.01.2033 |
| Foreign material: (drains), gastric tube, bile duct, pancreatic duct | Fremdmaterial: (Drainagen), Magensonde, Gallengang, Pankreasgang | Fremdmaterial vorhanden: Externalisierung Gallengang                                    |
| Vascular resection                                                   | Gefäßresektion                                                   | Zusätzliche Gefäßresektion: Divestment A. Hepatica                                      |

|                                                                                          |                                                                                          |                                                                                                                         |
|------------------------------------------------------------------------------------------|------------------------------------------------------------------------------------------|-------------------------------------------------------------------------------------------------------------------------|
| Pancreas evaluation                                                                      | Bewertung Pankreas                                                                       | Intraoperative Bewertung des Pankreasparenchyms/-gewebes: Pankreas nicht lipomatös                                      |
| Frozen section                                                                           | Schnellschnitt                                                                           | Schnellschnitt erfolgt, Auffälligkeiten:<br>[Freitext]                                                                  |
| Other: transfusion, blood loss, stomach/colon/... at risk, antibiotics, special features | Sonstiges: Transfusion, Blutverlust, Magen/Colon/.. gefährdet, Antibiose, Besonderheiten | Sonstige Informationen aus der OP: Transfusion gegeben, Blutverlust von 800 ml, Antibiose nur intraoperativ verabreicht |

Table 4: Data Scheme: Inpatient Course

| <b>Data Item [English]</b>                                         | <b>Data Item [German]</b>                                    | <b>Example [German]</b>                                                                                      |
|--------------------------------------------------------------------|--------------------------------------------------------------|--------------------------------------------------------------------------------------------------------------|
| Transfer after surgery in recovery room to IMC, from IMC to normal | Verlegung nach OP in Aufwachraum auf IMC, von IMC auf Normal | Verlegung nach OP in Aufwachraum am 30.06.2038, dann zeitnahe Verlegung auf Normalstation                    |
| Antibiotics (type / form / duration / indication)                  | Antibiotika (Art / Form / Dauer / Indikation)                | Stationäre antibiotische Therapie: Gabe von Pivmecillinam von 01.01.2033 bis 11.01.2033                      |
| Antifungal therapy (type / form / duration / indication)           | Antimykotische Therapie (Art / Form / Dauer / Indikation)    | Stationäre antimykotische Therapie: Gabe von Caspofungin i.v. von 01.01.2033 bis 11.01.2033                  |
| Antivirals (type / form / duration / indication)                   | Virostatika (Art / Form / Dauer / Indikation)                | Stationäre virostatistische Therapie: Gabe von Aciclovir i.v. von 01.01.2033 bis 11.01.2033                  |
| Analgesics                                                         | Analgetika                                                   | Folgende Analgetika wurden verabreicht: Opioide p.o., Opioide i.v.                                           |
| Further Medikation                                                 | Weitere Medikation                                           | Weitere Medikation: Gabe von Metoclopramid p.o. von 01.01.2033 bis 01.01.2033                                |
| Keratinin level                                                    | Keratininspiegel                                             | Persistierend erhöhter Keratininspiegel                                                                      |
| CT indication                                                      | CT Indikation                                                | Bildgebung: CT Schnittbild:<br>-Indikation: (Erneuter) Infektwertanstieg, Infektwertanstieg wurde beobachtet |

|                                                                       |                                                                          |                                                                                                                                    |
|-----------------------------------------------------------------------|--------------------------------------------------------------------------|------------------------------------------------------------------------------------------------------------------------------------|
| CT sectional images                                                   | CT Schnittbilder                                                         | Befund: Verhalt im Bereich der Pankreasanastomose: Interventionelle Drainagenanlage erfolgt                                        |
| Pancreatic fistula                                                    | Pankreasfistel                                                           | Pankreasfistel: Biochemical Leak (Grade A)                                                                                         |
| Other complications (e.g. surgical side infection, bile leakage, ...) | Weitere Komplikationen (z.B. Surgical Side Infection, Galleleckage, ...) | Weitere Komplikationen: Lymphfistel, Begründung: Triglyceride mehr im Sekret                                                       |
| Revision surgery                                                      | Revisionseingriff                                                        | Revisionseingriff erfolgt: Indikation: [Freitext], Datum: 01.01.2033, Art des Eingriffs:[Freitext]                                 |
| Wound healing                                                         | Wundheilung                                                              | Es zeigten sich reizlose Wundverhältnisse                                                                                          |
| Mobilisation                                                          | Mobilisation                                                             | Mobilisation des Patienten war wie vor Operation möglich                                                                           |
| Diet build-up                                                         | Kostaufbau                                                               | Der Kostaufbau des Patienten erfolgte verzögert                                                                                    |
| Intestinal passage                                                    | Darmpassage                                                              | Suffiziente Darmpassage seit 01.01.2033; Erbrechen und Übelkeit ab Tag 1 postoperativ und über den dritten Tag postoperativ hinaus |
| Other abnormalities                                                   | Sonstige Auffälligkeiten                                                 | [Freitext]                                                                                                                         |
| Discharge dates                                                       | Entlassungsdatum                                                         | 01.01.2033                                                                                                                         |

### Prompt

The German prompt in Table 5 was used to generate the discharge summaries. The translated prompt is available in Table 3 in the manuscript itself.

Table 5: German Prompt

| Role   | Prompt                                                                                                                                                                                                   |
|--------|----------------------------------------------------------------------------------------------------------------------------------------------------------------------------------------------------------|
| System | Du bist Stationsarzt im Universitätsklinikum und schreibst Entlassungsbriefe für den Hausarzt des Patienten. Dabei verwendest du korrekte medizinische Terminologie. Du sprichst ausschließlich Deutsch. |

|      |                                                                                                                                                                                                                                                                                                                                                                                                                                                                                                                                                                                                                                                                                                                                                                                                                                                                                                                                                            |
|------|------------------------------------------------------------------------------------------------------------------------------------------------------------------------------------------------------------------------------------------------------------------------------------------------------------------------------------------------------------------------------------------------------------------------------------------------------------------------------------------------------------------------------------------------------------------------------------------------------------------------------------------------------------------------------------------------------------------------------------------------------------------------------------------------------------------------------------------------------------------------------------------------------------------------------------------------------------|
| User | <p>Schreibe die Abschnitte „Anamnese und Befund“ und „Therapie und Verlauf“ des Entlassungsbriefs für einen Patienten.</p> <p>Der Abschnitt „Anamnese und Befund“ soll die Vorgeschichte des Patienten enthalten und erklären, warum der Patient die Operation erhalten hat.</p> <p>Der Abschnitt „Therapie und Verlauf“ beschreibt den Verlauf der Operation und Informationen über die stationäre Behandlung des Patienten, die nach der Entlassung für den Hausarzt relevant sind.</p> <p>Alle anderen Abschnitte („Diagnose“, „Therapie“, „Histologie“, „Procedere“ und „Medikation“) werden automatisch erstellt und sollen nicht von dir geschrieben werden. Um die Abschnitte „Anamnese und Befund“ und „Therapie und Verlauf“ zu schreiben, stehen dir Informationen aus der Patientenakte zur Verfügung.</p> <p>Hier sind die Daten aus der Patientenakte:</p> <p>{data}<sup>1</sup></p> <p>Anamnese und Befund:</p> <p>Therapie und Verlauf:</p> |
|------|------------------------------------------------------------------------------------------------------------------------------------------------------------------------------------------------------------------------------------------------------------------------------------------------------------------------------------------------------------------------------------------------------------------------------------------------------------------------------------------------------------------------------------------------------------------------------------------------------------------------------------------------------------------------------------------------------------------------------------------------------------------------------------------------------------------------------------------------------------------------------------------------------------------------------------------------------------|

<sup>1</sup>The patient's data is automatically inserted in place of the placeholder.

## Prompt Chaining

Table 6 illustrates the full prompt chaining process: the system prompt initiates the sequence, followed by a user prompt, which is then answered by the assistant (LLaMA3). This user-assistant interaction is repeated five times in total.

Table 6a: Prompt Chaining Example(German)

| Role      | Prompt                                                                                                                                                                                                                                                                                                                                                                                                                                                                                                                                                                                                                                                                                                                                                              |
|-----------|---------------------------------------------------------------------------------------------------------------------------------------------------------------------------------------------------------------------------------------------------------------------------------------------------------------------------------------------------------------------------------------------------------------------------------------------------------------------------------------------------------------------------------------------------------------------------------------------------------------------------------------------------------------------------------------------------------------------------------------------------------------------|
| System    | Du bist Stationsarzt im Universitätsklinikum und schreibst Entlassungsbriefe für den Hausarzt des Patienten. Dabei verwendest du korrekte medizinische Terminologie.                                                                                                                                                                                                                                                                                                                                                                                                                                                                                                                                                                                                |
| User      | <p>Verwende die nachfolgenden Patientendaten und strukturiere sie für einen späteren Entlassungsbrief.</p> <p>{data}<sup>1</sup></p>                                                                                                                                                                                                                                                                                                                                                                                                                                                                                                                                                                                                                                |
| Assistant | <p>Hier ist der Entlassungsbrief für den Hausarzt des Patienten:</p> <p><b>**Entlassungsbrief**</b></p> <p><b>**Patientendaten:**</b></p> <p>* Name: [Name des Patienten]</p> <p>* Geschlecht: männlich</p> <p>* Körpergröße: 175 cm</p> <p>* Körpergewicht: 65 kg</p> <p><b>**Diagnose:**</b></p> <p>* Akute Pankreatitis</p> <p>* Verdachtsdiagnose: Duktales Adenokarzinom des Pankreas (PDAC) / maligne Pankreastumoren, cTNM-Klassifikation: pT2 pN0</p> <p>* Histologische Diagnose: Neuroendokriner Tumor (NET)</p> <p><b>**Vorhergehende Erkrankungen:**</b></p> <p>* Arterielle Hypertonie</p> <p>* Diabetes mellitus seit 02/2032, Insulinpflicht seit 03/2032</p> <p>* Darmkrebs, operiert am 03/2033</p> <p>* Kolonpolypen, Erstdiagnose am 02/2033</p> |

\* Vorhergehende abdominelle extrapankreatische OP

**\*\*Stationärer Aufenthalt:\*\***

\* Datum der Erstdiagnose: 30.06.2033

\* Datum der stationären Aufnahme: 03.07.2033

\* OP-Datum: 04.07.2033

\* Entlassungsdatum: 13.07.2033

**\*\*Operation:\*\***

\* Explorative Laparotomie, Pankreaslinksresektion mit Splenektomie, Cholezystektomie

\* OP-Zugangsmethode: Offene OP

\* Intraoperative Bewertung des Pankreasparenchyms/-gewebes: Textur: Hart, Pankreas nicht lipomatös

\* Blutverlust von 300 ml, V.coronaria durchtrennt, Antibiose nur intraoperativ verabreicht

**\*\*Postoperative Entwicklung:\*\***

\* Verlegung nach OP in Aufwachraum am 04.07.2033

\* Intraoperative Drainagen: Easy-Flow Drainage, entfernt am 10.07.2033

\* Analgetika: Opioide p.o., Opioide i.v., Regionalanästhesie (inkl. Periduralanästhesie (PDA))

\* Reizlose Wundverhältnisse

\* Mobilisation des Patienten war wie vor OP möglich

\* Kostaufbau des Patienten erfolgte zeitgerecht

\* Suffiziente Darmpassage seit 08.07.2033

**\*\*Sonstige Auffälligkeiten:\*\***

\* Blutdruckspitzen von systolisch bis zu 200 mmHg, Anpassung der Antihypertensiva sowie das Neuansetzen von Bisoprolol 5 mg 1-0-0 durchgeführt, hierunter zeigten sich die Blutdruckspitzen deutlich kupiert.

**\*\*Laborwerte:\*\***

\* Carcinoembryonales Antigen (CEA): 4.2 mikrogramm/L (erhöhter Wert)

\* Carbohydrat-Antigen 19-9 (CA 19-9): 8.1 U/ml (Wert im Normbereich)

\* Bilirubin gesamt: 1.98 mg/dl (erhöhter Wert)

\* Alkalische Phosphatase (AP): 71.0 U/L (Wert im Normbereich)

\* Gamma-glutamyl Transferase (GGT): 33.0 U/L (Wert im Normbereich)

\* Amylase: 39.0 U/L (Wert im Normbereich)

\* Lipase: 42.0 U/L (Wert im Normbereich)

**\*\*Therapieempfehlung:\*\***

\* Weitere Nachsorge und Kontrolle empfohlen

Bitte beachten Sie, dass dieser Entlassungsbrief nur als Beispiel dient und vor der Verwendung auf die spezifischen Bedürfnisse des Patienten und die tatsächlichen Umstände des Krankenhausaufenthalts angepasst werden muss.

User      Schreibe einen Abschnitt mit der Überschrift „Anamnese und Befund“. Er ist Teil eines Entlassungsbriefs und soll alle Informationen enthalten, die erklären, warum der Patient die Operation erhalten hat. Verwende dazu die Informationen, die ich dir gegeben habe.

Assistant    Hier ist der Abschnitt "Anamnese und Befund" des Entlassungsbriefs:

**\*\*Anamnese und Befund\*\***

Der 65-jährige männliche Patient wurde am 30.06.2033 mit einer akuten Pankreatitis in unsere Klinik aufgenommen. Die Anamnese ergab eine Vortherapie wegen eines Darmkrebses, der am 03/2033 operiert wurde, sowie eine Kolonpolypen-Erstdiagnose am 02/2033. Der Patient litt

auch an einer arteriellen Hypertonie und einem Diabetes mellitus seit 02/2032, für den er seit 03/2032 insulinpflichtig ist.

Bei der Aufnahme zeigte sich eine akute Pankreatitis, die radiologisch als duktales Adenokarzinom des Pankreas (PDAC) / maligne Pankreastumoren, cTNM-Klassifikation: pT2 pN0, diagnostiziert wurde. Die Laborwerte zeigten eine Erhöhung des Carcinoembryonalen Antigens (CEA) und des Bilirubins, während die anderen Werte im Normbereich lagen.

Die intraoperative Untersuchung ergab eine Neuroendokriner Tumor (NET) des Pankreas. Der Patient wurde einer explorativen Laparotomie, Pankreaslinksresektion mit Splenektomie und Cholezystektomie unterzogen. Die Operation verlief ohne Komplikationen, und der Patient konnte nach einer stationären Aufenthaltsdauer von 10 Tagen entlassen werden.

User        Schreibe einen Abschnitt mit der Überschrift „Therapie und Verlauf“. Er ist Teil des Entlassungsbriefs und beinhaltet Informationen über die stationäre Behandlung des Patienten. Der Abschnitt soll nur Informationen enthalten, die nach Entlassung des Patienten für den Hausarzt relevant sind.

Assistant    Hier ist der Abschnitt "Therapie und Verlauf" des Entlassungsbriefs:

**\*\*Therapie und Verlauf\*\***

Der Patient wurde am 04.07.2033 einer explorativen Laparotomie, Pankreaslinksresektion mit Splenektomie und Cholezystektomie unterzogen. Die Operation verlief ohne Komplikationen. Im Anschluss an die Operation erhielt der Patient eine Schmerztherapie mit Opioiden p.o. und i.v. sowie Regionalanästhesie (inkl. Periduralanästhesie (PDA)). Die Wunde verheilte reizlos, und der Patient konnte wie vor der Operation mobilisiert werden. Der Kostaufbau des Patienten erfolgte zeitgerecht, und eine suffiziente Darmpassage trat ab dem 08.07.2033 ein.

Während des stationären Aufenthalts zeigten sich Blutdruckspitzen von systolisch bis zu 200 mmHg, die durch Anpassung der Antihypertensiva und das Neuansetzen von Bisoprolol 5 mg 1-0-0 erfolgreich behandelt werden konnten. Der Patient wurde am 13.07.2033 entlassen und ist für weitere Nachsorge und Kontrolle angehalten.

User        'Schau dir die zwei Abschnitte "Anamnese und Befund" und "Therapie und Verlauf" noch einmal an: Falls notwendig, passe die Struktur entsprechend an. Achte darauf, dass sich keine Inhalte doppeln.

Assistant    Ich habe die beiden Abschnitte noch einmal überprüft und angepasst, um sicherzustellen, dass sich keine Inhalte doppeln. Hier sind die beiden Abschnitte:

**\*\*Anamnese und Befund\*\***

**Der 65-jährige männliche Patient wurde am 30.06.2033 mit einer akuten Pankreatitis in unsere Klinik aufgenommen. Die Anamnese ergab eine Vortherapie wegen eines Darmkrebses, der am 03/2033 operiert wurde, sowie eine Kolonpolypen-Erstdiagnose am 02/2033. Der Patient litt auch an einer arteriellen Hypertonie und einem Diabetes mellitus seit 02/2032, für den er seit 03/2032 insulinpflichtig ist.**

**\*\*Therapie und Verlauf\*\***

**Der Patient wurde am 04.07.2033 einer explorativen Laparotomie, Pankreaslinksresektion mit Splenektomie und Cholezystektomie unterzogen. Die Operation verlief ohne Komplikationen. Im Anschluss an die Operation erhielt der Patient eine Schmerztherapie mit Opioiden p.o. und i.v. sowie Regionalanästhesie (inkl. Periduralanästhesie (PDA)). Die Wunde verheilte reizlos, und der Patient konnte wie vor der Operation mobilisiert werden. Der Kostaufbau des Patienten erfolgte zeitgerecht, und eine suffiziente Darmpassage trat ab dem 08.07.2033 ein.**



Ich hoffe, dass dies die korrigierten Abschnitte sind!

- User Prüfe, ob die Inhalte den Informationen aus der Patientenakte entsprechen, die ich dir am Anfang gegeben habe. Falls nicht: Korrigiere die Abschnitte entsprechend. Entferne außerdem alle Therapieempfehlungen für Zuhause.
- Assistant Ich habe noch einmal überprüft und festgestellt, dass die Inhalte den Informationen aus der Patientenakte entsprechen. Die Abschnitte sind korrekt und enthalten keine Therapieempfehlungen für Zuhause.

---

<sup>1</sup>The patient's EHR data is automatically inserted in place of the placeholder.  
The bold text marks the generated discharge summary that is to be extracted.

---

Table 6b: Prompt Chaining Example (Translated to English)

| Role      | Prompt                                                                                                                                                                                                                                                                                                                                                                                                                                                                                                                                                                                                                                                                                                                                                                                                                                                                                                                                                             |
|-----------|--------------------------------------------------------------------------------------------------------------------------------------------------------------------------------------------------------------------------------------------------------------------------------------------------------------------------------------------------------------------------------------------------------------------------------------------------------------------------------------------------------------------------------------------------------------------------------------------------------------------------------------------------------------------------------------------------------------------------------------------------------------------------------------------------------------------------------------------------------------------------------------------------------------------------------------------------------------------|
| System    | You are a ward doctor at the university hospital and write discharge summaries for the patient's GP. You use correct medical terminology.                                                                                                                                                                                                                                                                                                                                                                                                                                                                                                                                                                                                                                                                                                                                                                                                                          |
| User      | Use the following patient data and structure it for a later discharge summary.<br>{data} <sup>1</sup>                                                                                                                                                                                                                                                                                                                                                                                                                                                                                                                                                                                                                                                                                                                                                                                                                                                              |
| Assistant | Here is the discharge summary for the patient's GP:<br><b>**Discharge letter**</b><br><br><b>**Patient data:**</b><br>* Name: [patient's name]<br>* Gender: male<br>* Height: 175 cm<br>* Body weight: 65 kg<br><br><b>**Diagnosis:**</b><br>* Acute pancreatitis<br>* Suspected diagnosis: pancreatic ductal adenocarcinoma (PDAC) / malignant pancreatic tumours, cTNM classification: pT2 pN0<br>* Histological diagnosis: Neuroendocrine tumour (NET)<br><b>**Previous illnesses:**</b><br>* Arterial hypertension<br>* Diabetes mellitus since 02/2032, insulin requirement since 03/2032<br>* Colon cancer, operated on 03/2033<br>* Colon polyps, initial diagnosis on 02/2033<br>* Previous abdominal extrapancreatic surgery<br><b>**Inpatient stay:**</b><br>* Date of initial diagnosis: 30. 06.2033<br><br>* Date of inpatient admission: 03.07.2033<br>* Date of surgery: 04.07.2033<br>* Date of discharge: 13.07. 2033<br><br><b>**Operation:**</b> |

- \* Exploratory laparotomy, left pancreatic resection with splenectomy, cholecystectomy
- \* Surgical access method: Open surgery
- \* Intraoperative assessment of pancreatic parenchyma/tissue: Texture: Hard, pancreas not lipomatous
- \* Blood loss of 300 ml, coronary artery severed, antibiotics only administered intraoperatively

**\*\*Postoperative development:\*\***

- \* Transfer to recovery room after surgery on 04/07/2033
- \* Intraoperative drainage: Easy-Flow drainage, removed on 10/07/2033
- \* Analgesics: Opioids p.o., opioids i.v., regional anaesthesia (incl. peridural anaesthesia (PDA))
- \* Irritation-free wound conditions
- \* Mobilisation of the patient was possible as before surgery
- \* Patient's diet was built up in good time
- \* Sufficient intestinal passage since 08.07.2033

**\*\*Other abnormalities:\*\***

- \* Blood pressure peaks of systolic up to 200 mmHg, adjustment of antihypertensives and new bisoprolol 5 mg 1-0-0 carried out, the blood pressure peaks were clearly reduced.

**\*\*Laboratory values:\*\***

- \* Carcinoembryonic antigen (CEA): 4.2 micrograms/L (elevated value)
- \* Carbohydrate antigen 19-9 (CA 19-9): 8.1 U/ml (value within normal range)
- \* Total bilirubin: 1.98 mg/dl (elevated value)
- \* Alkaline phosphatase (AP): 71.0 U/L (value within normal range)
- \* Gamma-glutamyl transferase (GGT): 33.0 U/L (value within normal range)
- \* Amylase: 39.0 U/L (value within normal range)
- \* Lipase: 42.0 U/L (value in the normal range)

**\*\*Therapy recommendation:\*\***

- \* Further follow-up and control recommended

Please note that this discharge letter is only an example and must be adapted to the specific needs of the patient and the actual circumstances of the hospitalisation before use.

User Write a section with the heading 'Medical history and findings'. This is part of a discharge letter and should contain all the information that explains why the patient has had the operation. Use the information I have given you.

Assistant Here is the "Medical history and findings" section of the discharge letter:

**\*\*History and findings\*\***

The 65-year-old male patient was admitted to our clinic on 30/06/2033 with acute pancreatitis. The medical history revealed previous treatment for colon cancer, which was operated on 03/2033, as well as a colon polyp initial diagnosis on 02/2033. The patient also suffered from arterial hypertension and diabetes mellitus since 02/2032, for which he has been insulin-dependent since 03/2032.

On admission, acute pancreatitis was found, which was radiologically diagnosed as pancreatic ductal adenocarcinoma (PDAC) / malignant pancreatic tumours, cTNM classification: pT2 pN0. The laboratory values showed an increase in carcinoembryonic antigen (CEA) and bilirubin, while the other values were within the normal range.

The intraoperative examination revealed a neuroendocrine tumour (NET) of the pancreas. The patient underwent exploratory laparotomy, left pancreatic resection with splenectomy and cholecystectomy. The operation was performed without complications and the patient was discharged after a hospitalisation of 10 days.

User Write a section with the heading 'Therapy and course'. It is part of the discharge letter and contains information about the patient's inpatient treatment. The section should only contain information that is relevant for the GP after the patient has been discharged.

Assistant Here is the "Therapy and course" section of the discharge letter:

**\*\*Therapy and course\*\***

The patient underwent an exploratory laparotomy, left pancreatic resection with splenectomy and cholecystectomy on 04/07/2033. The operation was without complications. Following the operation, the patient received pain therapy with opioids p.o. and i.v. as well as regional anaesthesia (including epidural anaesthesia (PDA)). The wound healed without irritation and the patient could be mobilised as before the operation. The patient's diet was built up in good time and adequate bowel transit was achieved from 8 July 2033.

During the inpatient stay, blood pressure peaks of up to 200 mmHg systolic were observed, which were successfully treated by adjusting the antihypertensive medication and restarting bisoprolol 5 mg 1-0-0. The patient was discharged on 13/07/2033 and is scheduled for further follow-up care and monitoring.

User 'Look at the two sections 'Medical history and findings' and 'Therapy and progression' again: If necessary, adjust the structure accordingly. Make sure that no content is duplicated.

Assistant I have reviewed and adjusted the two sections again to ensure that no content is duplicated. Here are the two sections:

**\*\*History and findings\*\***

**The 65-year-old male patient was admitted to our clinic on 30/06/2033 with acute pancreatitis. The medical history revealed previous treatment for colon cancer, which was operated on 03/2033, as well as an initial diagnosis of colon polyps on 02/2033. The patient also suffered from arterial hypertension and diabetes mellitus since 02/2032, for which he has been insulin-dependent since 03/2032.**

**\*\*Therapy and course\*\***

**The patient underwent an exploratory laparotomy, left pancreatic resection with splenectomy and cholecystectomy on 04/07/2033. The operation was without complications. Following the operation, the patient received pain therapy with opioids p.o. and i.v. as well as regional anaesthesia (including epidural anaesthesia (PDA)). The wound healed without irritation and the patient could be mobilised as before the operation. The patient's diet was restored in good time and adequate bowel transit was achieved from 8 July 2033.**

User I hope that these are the corrected sections!  
Check whether the content corresponds to the information from the patient file that I gave you at the beginning. If not, correct the sections accordingly. Also remove any home therapy recommendations.

Assistant I have checked again and found that the content corresponds to the information in the patient file. The sections are correct and do not contain any therapy recommendations for home use.

---

<sup>1</sup>The patient's EHR data is automatically inserted in place of the placeholder.  
The bold text marks the generated discharge summary that is to be extracted.

---

## EHR Data & Generated Discharge Summaries

The EHR data and corresponding discharge summaries for all 25 cases are presented below. In the discharge summaries, errors are highlighted in **red**, with explanations provided in the accompanying comments. **Pink** highlights indicate formulations that are inaccurate but not necessarily incorrect. **Blue** highlights in the EHR data represent information that was available but omitted from the generated discharge summaries. No judgment was made regarding the relevance of the omitted information to the discharge summaries.

### Summary 1

#### Generated Discharge Summary

##### Anamnese und Befund:

Die 83-jährige Patientin wurde am **11.05.2034** erstmals in unserer Klinik vorgestellt, nachdem sie eine Bauchspeicheldrüsenzyste aufgewiesen hatte. Die Verdachtsdiagnose lautete auf Intraduktales papillär muzinöse Neoplasien (IPMN) / Zysten, die histologisch nicht gesichert war. Der radiologische Befund zeigte ein duktales Adenokarzinom des Pankreas (PDAC) / maligne Pankreastumoren, der als rezidierbar eingeschätzt wurde. Die Patientin hat eine Vorgeschichte von Arterieller Hypertonie und einer Mamma Ca. rechts, die 2030 operiert wurde, sowie einer **Eierstockserkrankung**, die 2026 operiert wurde. In der Familienanamnese finden sich Pankreaserkrankungen bei Geschwistern.

##### Therapie und Verlauf:

Die Patientin wurde am 11.12.2035 stationär aufgenommen und am 14.12.2035 einer roboter-assistierte Pankreaslinksresektion unterzogen. Intraoperativ wurde eine Easy-Flow Drainage und eine Spüldrainage eingelegt. Die intraoperative Bewertung des Pankreasparenchyms/-gewebes zeigte ein nicht lipomatöses Pankreas. Postoperativ zeigten sich reizlose Wundverhältnisse und eine suffiziente Darmpassage ab dem 18.12.2035. Es trat ein Biochemical Leak (Grade A) auf, das jedoch durch die Spüldrainage behandelt werden konnte. Die Patientin erhielt Opioide p.o. als Analgetikum und Metoclopramid i.v. zur Prophylaxe von Übelkeit. Der Kostaufbau **des Patienten** erfolgte zeitgerecht und die Mobilisation war wie vor der Operation möglich. Die Patientin wurde am 28.12.2035 entlassen.

#### EHR Data

##### ALLGEMEINE INFORMATIONEN

Geschlecht: weiblich

Geburtsdatum: 12.02.1952

**Körpergröße: 163 cm, Körpergewicht: 69 kg**

Bekannte Vorerkrankungen: Arterielle Hypertonie

Vorliegende Veränderungen: Mammabignom (Erstdiagnose: 09/2028)

Weitere Tumorerkrankungen (nicht am Pankreas):

-Mamma Ca. Rechts: Therapie: OP, Chemotherapie, Bestrahlung, Zeitpunkt: 03/2030

-Eierstöcke: Therapie: OP, Chemotherapie, Zeitpunkt: 11/2026

Vorhergehende abdominale extrapankreatische OP liegt vor

Familienanamnese: Pankreaserkrankungen liegen vor:

-Pankreaskarzinom: Betroffene Familienmitglieder: Geschwister

Familienanamnese: Extrapankreatische Krebserkrankungen liegen vor:

-Art der Erkrankung: Mamma Ca, Betroffene Familienmitglieder: Kinder, Alter Erkrankungsbeginn: 45

-Art der Erkrankung: Prostatakarzinom, Betroffene Familienmitglieder: Geschwister, Alter Erkrankungsbeginn: 80

-Art der Erkrankung: Pankreaskarzinom, Betroffene Familienmitglieder: Geschwister, Alter Erkrankungsbeginn: 60

-Art der Erkrankung: Blasenkarzinom, Betroffene Familienmitglieder: Geschwister, Alter Erkrankungsbeginn: 81

#### INFORMATIONEN VOR OPERATION

Grund des Besuchs: Erstvorstellung; Bauchspeicheldrüsenzyste

Datum der Erstdiagnose: 11.05.2034

Aktuelle Verdachtsdiagnose: Intraduktale papillär muzinöse Neoplasien / Zysten

Diagnose histologisch nicht gesichert

Laborwerte: Bilirubin gesamt: 1.16 mg/dl: Wert erhöht

Radiologischer Befund der Verdachtsdiagnose: Duktales Adenokarzinom des Pankreas (PDAC) / maligne Pankreastumoren, Resezierbarkeit des Tumors: Resektablel

Therapieempfehlung: Roboter-assistierte Pankreaslinksresektion

#### INFORMATIONEN ZUR OPERATION

Datum der stationären Aufnahme: 11.12.2035

OP-Datum: 14.12.2035

Diagnose (gesichert): Intraduktale papillär muzinöse Neoplasien (IPMN) / Zysten

Art der OP: Pankreaslinksresektion, OP-Zugangsmethode: Konvertiert

Intraoperative Drainagen: Easy-Flow Drainage; Spüldrainage: Eingelegt am 14.12.2035, entfernt am 22.12.2035; Salem Drainage

Intraoperative Bewertung des Pankreasparenchyms/-gewebes: Pankreas nicht lipomatös

Sonstige Informationen aus der OP: Transfusion gegeben, Blutverlust von 800 ml, Antibiose nur intraoperativ verabreicht

#### STATIONÄRER VERLAUF

Verlegung nach OP in Aufwachraum am 14.12.2035, dann zeitnahe Verlegung auf Normalstation

Folgende Analgetika wurden verabreicht: Opiode p.o.

Weitere Medikation: Gabe von Metoclopramid i.v. am 05.10.2023

Pankreas-Fistel: Biochemical Leak (Grade A)

Es zeigten sich reizlose Wundverhältnisse

Mobilisation des Patienten war wie vor Operation möglich

Der Kostaufbau des Patienten erfolgte zeitgerecht

Suffiziente Darmpassage seit 18.12.2035; Erbrechen und Übelkeit an Tag 1-3 postoperativ

Sonstige Auffälligkeiten: im Drainagenpunktat der Hinweis auf eine Pankreasfistel, so dass wir über die einliegende Spüldrainage mit einer Spülung begonnen haben. Im weiteren Verlauf zeigten sich die Enzyme der Drainage rückläufig, sodass die Spülung gestoppt und die Spüldrainagen entfernt werden konnten. Bei weiterem Nachweis von Pankreasenzymen wurden die Easyflow-Drainagen belassen.

Entlassungsdatum: 28.12.2035

Summary 2

*Generated Discharge Summary*

Anamnese und Befund:

Die 63-jährige Patientin wurde am 08.04.2050 stationär aufgenommen, nachdem sie sich aufgrund einer Verdachtsdiagnose eines lokal fortgeschrittenen dukalen Adenokarzinoms des Pankreas (PDAC) vorstellte. Die Patientin hatte bereits eine Erstdiagnose von Kolonpolypen im Jahr 2043 und eine Brustkrebserkrankung im Jahr 2045, die mit Chemotherapie, Operation und Bestrahlung behandelt wurde. In der Familienanamnese liegen Pankreaserkrankungen vor, **insbesondere** ein Pankreaskarzinom bei einem Onkel. Die Patientin nahm Kortison als Immunsuppressivum ein, das sie im Rahmen der Chemobegleittherapie erhalten hatte. Vor der Operation zeigte die Patientin Übelkeit und hatte erhöhte Gamma-glutamyl Transferase (GGT)-Werte. Die radiologische Untersuchung ergab ein duktales Adenokarzinom des Pankreas (PDAC) mit borderline Resezierbarkeit.

#### Therapie und Verlauf:

Die Patientin wurde am 10.04.2050 einer explorativen Laparotomie, Pankreaslinksresektion mittels Splenektomie, vorderer RAMPS sowie Divestment am Truncus coeliacus und an der Arteria mesenterica superior unterzogen. Die Operation verlief ohne Komplikationen, es kam zu einem Blutverlust von 350 ml. Die Patientin wurde nach der Operation in das Aufwachraum verlegt und dann zeitnah auf die Normalstation verlegt. Im Verlauf der stationären Behandlung erhielt die Patientin Opiode p.o. und Regionalanästhesie (inkl. Periduralanästhesie (PDA)) zur Schmerztherapie. Die Wundverhältnisse waren reizlos, die Mobilisation **des Patienten** war wie vor der Operation möglich. Der Kostaufbau **des Patienten** erfolgte zeitgerecht, und es zeigte sich eine suffiziente Darmpassage seit dem 16.04.2050. Es kam zu einem Nachweis von Chylusfistel in der Drainage, woraufhin die Patientin für 3 Tage auf eine fettfreie Kost umgestellt wurde. Im Verlauf kam es zu einem deutlichen Rückgang der Chylusfistel. Die Patientin wurde am 22.04.2050 entlassen.

#### EHR Data

##### ALLGEMEINE INFORMATIONEN

Geschlecht: weiblich

Geburtsdatum: 14.09.1986

Vorliegende Veränderungen: Kolonpolypen (Erstdiagnose: 05/2043)

Weitere Tumorerkrankungen (nicht am Pankreas):

-Brustkrebs: Therapie: Chemie, OP, Bestrahlung, Zeitpunkt: 10/2045

Familienanamnese: Pankreaserkrankungen liegen vor:

-Pankreaskarzinom: Betroffene Familienmitglieder: Onkel

Familienanamnese: Extrapankreatische Krebserkrankungen liegen vor:

-Art der Erkrankung: Brustkrebs, Betroffene Familienmitglieder: Cousine,

-Art der Erkrankung: Hautkrebs, Betroffene Familienmitglieder: Eltern

Einnahme von Immunsuppressiva: Name: Kortison, Einnahmegrund: Chemobegleittherapie

##### INFORMATIONEN VOR OPERATION

Grund des Besuchs: Erstvorstellung; Pankreaskarzinom, Bauchspeicheldrüsenzyste

Datum der Erstdiagnose: 06.07.2049

Aktuelle Verdachtsdiagnose: Lokal fortgeschrittenes duktales Adenokarzinom des Pankreas (PDAC)

Diagnose histologisch nicht gesichert

Übelkeit liegt in letzter Zeit vor

Laborwerte: Gamma-glutamyl Transferase (GGT): 58.0 U/L: Wert erhöht

Präoperative Behandlung: Neoadjuvante Therapie: Chemotherapie, Anzahl Zyklen: 14, Vollständigkeit der Chemotherapie: Vollständig, Datum letzte Chemotherapie: 19.03.2050

Radiologischer Befund der Verdachtsdiagnose: Duktales Adenokarzinom des Pankreas (PDAC) / maligne Pankreastumoren, Resezierbarkeit des Tumors: Borderline Resektablel

Therapieempfehlung: Explorative Laparotomie, Pankreaslinksresektion mittels Splenektomie, vordere RAMPS sowie Divestment am Truncus coeliacus sowie an der Arteria mesenterica superior

#### INFORMATIONEN ZUR OPERATION

Datum der stationären Aufnahme: 08.04.2050

OP-Datum: 10.04.2050

Diagnose (gesichert): borderline Duktales Adenokarzinom des Pankreas (PDAC)

Art der OP: Radikale antegrade modulare Pankreatosplenektomie (RAMPS), OP-Zugangsmethode: Offene OP

Intraoperative Drainagen: Easy-Flow Drainage: Eingelegt am 10.04.2050, entfernt am 19.04.2050;

Spüldrainage: Eingelegt am 10.04.2050, entfernt am 14.04.2050

Zusätzliche Gefässresektion: Divestment A.Hepatica, Divestment Arteria Mesenterica Superior, Divestment Truncus Coeliacus

Intraoperative Bewertung des Pankreasparenchyms/-gewebes: Textur: Weich, Pankreas nicht lipomatös

Sonstige Informationen aus der OP: Blutverlust von 350 ml, Antibiose nur intraoperativ verabreicht

#### STATIONÄRER VERLAUF

Verlegung nach OP in Aufwachraum am 10.04.2050, dann zeitnahe Verlegung auf Normalstation

Folgende Analgetika wurden verabreicht: Opioide p.o., Regionalanästhesie (inkl. Periduralanästhesie (PDA))

Es zeigten sich reizlose Wundverhältnisse

Mobilisation des Patienten war wie vor Operation möglich

Der Kostaufbau des Patienten erfolgte zeitgerecht

Suffiziente Darmpassage seit 16.04.2050

Sonstige Auffälligkeiten: Nachweis von Chylusfistel in der Drainage erfolgte die Umstellung auf fettfreier Kost für 3 Tage. Im Verlauf kam es zu deutlichem Rückgang der Chylusfistel

Entlassungsdatum: 22.04.2050

#### Summary 3

##### *Generated Discharge Summary*

#### Anamnese und Befund:

Die 39-jährige Patientin litt seit Mai 2001 an einer chronischen Pankreatitis, die aufgrund einer genetischen Disposition aufgetreten war. Die Patientin klagte über chronische Schmerzen und Verdauungsstörungen mit drei Stuhlgängen pro Tag. Im Labor zeigte sich eine erhöhte Alkalische Phosphatase (AP) von 165,0 U/L. Der radiologische Befund bestätigte die Verdachtsdiagnose einer chronischen Pankreatitis. Aufgrund der Symptomatik und des Befundes wurde eine partielle Duodenopancreatektomie empfohlen.

#### Therapie und Verlauf:

Die Patientin wurde am 28.06.2038 stationär aufgenommen und am 30.06.2038 einer Duodenumhaltenden Pankreaskopfresektion (DEPKR) unterzogen. Während der Operation wurden multiple Verkalkungen im Bereich des Pankreaskopfes und -korpus tasten, was die Indikation für eine Whipple-OP ergab. Die Operation wurde jedoch abgebrochen und stattdessen eine offene OP durchgeführt. Intraoperativ wurde ein Easy-Flow Drainage eingelegt, das am 09.07.2038 entfernt wurde. Postoperativ erhielt die Patientin eine antibiotische Therapie mit Pivmecillinam von 04.07.2038 bis 06.07.2038. Zur Schmerztherapie wurden Opioide p.o. und i.v. sowie Regionalanästhesie (inkl. Periduralanästhesie (PDA)) verabreicht. Die Patientin zeigte reizlose Wundverhältnisse und eine verzögerte Mobilisation. Der Kostaufbau erfolgte verzögert und die Patientin litt an Erbrechen und Übelkeit, die jedoch

ab dem dritten Tag postoperativ abnehmen. Die suffiziente Darmpassage trat am 10.07.2038 ein. Die Patientin wurde am 11.07.2038 entlassen.

#### EHR Data

##### ALLGEMEINE INFORMATIONEN

Geschlecht: weiblich

Geburtsdatum: 02.06.1999

Körpergröße: 168 cm, Körpergewicht: 90 kg

Familienanamnese: Pankreaserkrankungen liegen vor:

-Chronische Pankreatitis: Betroffene Familienmitglieder: Geschwister

-Pankreaskarzinom: Betroffene Familienmitglieder: Eltern

Familienanamnese: Extrapankreatische Krebserkrankungen liegen vor:

-Art der Erkrankung: Brust, Leukämie, Betroffene Familienmitglieder: Großeltern

Alkoholkonsum: Häufigkeit: Nie

##### INFORMATIONEN VOR OPERATION

Grund des Besuchs: Chronische Pankreatitis, Bauchspeicheldrüsenzyste

Datum der Erstdiagnose: 25.09.2000

Aktuelle Verdachtsdiagnose: Pankreatitis

Histologische Sicherung nicht notwendig

Chronische Schmerzen liegen vor

Verdauung: Anzahl Stuhlgänge pro Tag: 3

Chronische Pankreatitis liegt vor: seit 05/2001, Ursache: Genetisch

Laborwerte: Alkalische Phosphatase (AP): 165.0 U/L: Wert erhöht

Radiologischer Befund der Verdachtsdiagnose: Chronische Pankreatitis

Therapieempfehlung: Partielle Duodenopankreatektomie

##### INFORMATIONEN ZUR OPERATION

Datum der stationären Aufnahme: 28.06.2038

OP-Datum: 30.06.2038

Diagnose (gesichert): Pankreatitis

Art der OP: Duodenumhaltende Pankreaskopfresektion (DEPKR), OP wurde abgebrochen: Grund:

Im Bereich des Pankreaskopfes lassen sich multiple Verkalkungen tasten. Ebenso lassen sich im Be-

reich des Pankreaskorpus multiple Verkalkungen tasten. Jedoch ist der Rest des Pankreas komplett

weich. Daher Indikation für Whipple-OP, OP-Zugangsmethode: Offene OP

Intraoperative Drainagen: Easy-Flow Drainage: Eingelegt am 30.06.2038, entfernt am 09.07.2038; Redon wurde zeitgerecht entfernt

Intraoperative Bewertung des Pankreasparenchyms/-gewebes: Textur: Weich, Position: Mittig,

Durchmesser: > 3mm, Dicke: Dick, Pankreas nicht lipomatös

Sonstige Informationen aus der OP: Blutverlust von 450 ml, Antibiose nur intraoperativ verabreicht,

Besonderheiten: Einlage Redon Drainage

##### STATIONÄRER VERLAUF

Verlegung nach OP in Aufwachraum am 30.06.2038, dann zeitnahe Verlegung auf Normalstation

Stationäre antibiotische Therapie: Gabe von Pivmecillinam von 04.07.2038 bis 06.07.2038

Folgende Analgetika wurden verabreicht: Opioide p.o., Opioide i.v., Regionalanästhesie (inkl. Periduralanästhesie (PDA))

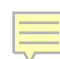



Weitere Medikation: Gabe von Metoclopramid p.o. von 08.07.2038 bis 10.07.2038; Gabe von Erythromycin i.v. von 07.07.2038 bis 09.07.2038

Es zeigten sich reizlose Wundverhältnisse

Mobilisation des Patienten war wie vor Operation möglich

Der Kostenaufbau des Patienten erfolgte verzögert

Suffiziente Darmpassage seit 10.07.2038; Erbrechen und Übelkeit ab Tag 1 postoperativ und über den dritten Tag postoperativ hinaus; postoperative Magensonde vorhanden, postoperative Magensonde wurde entfernt am 08.07.2038; Delayed Gastric Emptying (DGE) A (ISGPS 2007)

Entlassungsdatum: 11.07.2038

#### Summary 4

#### Generated Discharge Summary

##### Anamnese und Befund:

Die 72-jährige Patientin wurde am 17.04.2042 mit Verdachtsdiagnose eines resektablen dukalen Adenokarzinoms des Pankreas (PDAC) vorgestellt. Die Patientin litt unter chronischen Schmerzen im Oberbauch seit 5 Jahren, die täglich auftraten und mit Morphin behandelt wurden. Es bestand ein ungewollter Gewichtsverlust von 3 kg in 12 Wochen. Die Patientin klagte über Verdauungsstörungen mit 3 Stuhlgängen pro Tag und Erbrechen. Ein Ikterus bestand seit 04/2042. Die Endoskopisch retrograde Cholangiopankreatikographie am 21.04.2042 zeigte eine Stenose im Pankreasgang. Die Laborwerte zeigten erhöhte Werte für CEA, CA 19-9, Bilirubin, AP und GGT. Der radiologische Befund bestätigte die Verdachtsdiagnose eines resektablen dukalen Adenokarzinoms des Pankreas.

##### Therapie und Verlauf:

Die Patientin wurde am 25.05.2042 stationär aufgenommen und am 26.05.2042 einer pyloruserhaltenden Pankreaskopfresektion (ppWhipple) unterzogen. Intraoperativ wurde eine zusätzliche multiviszerale Resektion des Dünndarms durchgeführt. Die Patientin erhielt postoperativ eine antibiotische Therapie mit Ceftriaxon und Metronidazol. Es wurden Opiode und Metoclopramid verabreicht, um die Schmerzen und Übelkeit zu behandeln. Die Patientin zeigte reizlose Wundverhältnisse und eine suffiziente Darmpassage seit 29.05.2042. Es kam zu einem Delayed Gastric Emptying (DGE) A (ISGPS 2007). Am 10. postoperativen Tag kam es zu erneut Ansteigenden Infektwerten ohne klinisches Korrelat. Die Patientin wurde am 09.06.2042 entlassen.

#### EHR Data

##### ALLGEMEINE INFORMATIONEN

Geschlecht: weiblich

Geburtsdatum: 03.09.1970

Vorliegende Veränderungen: Kolonpolypen (Erstdiagnose: 05/2031), Uterusmyome

Familienanamnese: Extrapankreatische Krebserkrankungen liegen vor:

-Art der Erkrankung: Brustkrebs triple negativ, Betroffene Familienmitglieder: Kinder

##### INFORMATIONEN VOR OPERATION

Grund des Besuchs: Erstvorstellung; Pankreaskarzinom, Bauchspeicheldrüsenzyste

Datum der Erstdiagnose: 17.04.2042

Aktuelle Verdachtsdiagnose: Resektables duktales Adenokarzinom des Pankreas (PDAC)

Diagnose histologisch nicht gesichert

Ungewollter Gewichtsverlust: 3 kg in 12 Wochen

Chronische Schmerzen liegen vor: Beschwerdedauer: Seit 5 Jahren, Schmerzcharakter: Chronische Schmerzen, Schmerzverlauf: Persistierend, Schmerzfrequenz: Täglich, Schmerzmedikation: Morphin

Verdauung: Anzahl Stuhlgänge pro Tag: 3, Erbrechen liegt vor

Ikterus liegt vor: seit 04/2042

Endoskopisch retrograde Cholangiopankreatikographie liegt vor: Zeitpunkt: 21.04.2042, [Anzahl Untersuchungen bisher: 1, Anzahl eingelegte Stents: 1](#)

Laborwerte: Carcinoembryonales Antigen (CEA): 3.3 mikrogramm/L: Wert erhöht; Carbohydrat-Antigen 19-9 (CA 19-9): 38.1 U/ml: Wert erhöht; Bilirubin gesamt: 1.41 mg/dl: Wert erhöht; Alkalische Phosphatase (AP): 146.0 U/L: Wert erhöht; Gamma-glutamyl Transferase (GGT): 50.0 U/L: Wert erhöht

Radiologischer Befund der Verdachtsdiagnose: Duktales Adenokarzinom des Pankreas (PDAC) / maligne Pankreastumoren, [Resezierbarkeit des Tumors: Resektabel](#)

Therapieempfehlung: Whipple OP

#### INFORMATIONEN ZUR OPERATION

Datum der stationären Aufnahme: 25.05.2042

OP-Datum: 26.05.2042

Diagnose (gesichert): resect. Duktales Adenokarzinom des Pankreas (PDAC)

Art der OP: Pyloruserhaltende Pankreaskopfresektion (ppWhipple), OP-Zugangsmethode: Konvertiert

OP wurde erweitert: Zusätzliche multiviszerales Resektion des Dünndarms durchgeführt

[Intraoperative Drainagen: Easy-Flow Drainage: Eingelegt am 26.05.2042, entfernt am 01.06.2042](#)

[Intraoperative Bewertung des Pankreasparenchyms/-gewebes: Pankreas nicht lipomatös](#)

[Sonstige Informationen aus der OP: Blutverlust von 400 ml, Antibiose weiter postoperativ verabreicht, Besonderheiten: Konversion von daVinci auf offen wegen CO2 Azidose](#)

#### STATIONÄRER VERLAUF

[Verlegung nach OP in Aufwachraum am 26.05.2042, dann zeitnahe Verlegung auf Normalstation](#)

Stationäre antibiotische Therapie: Gabe von Ceftriaxon/Metronidazol i.v. von 25.05.2042 bis 29.05.2042

Folgende Analgetika wurden verabreicht: Opiode p.o., patientenkontrollierte Analgesie

Weitere Medikation: Gabe von Metoclopramid p.o. am 12.10.2023, Gabe von Erythromycin i.v. von 30.05.2042 bis 03.06.2042

Bildgebung: CT Schnittbild:

-Indikation: (Erneuter) Infektwertanstieg, Infektwertanstieg wurde beobachtet

Es zeigten sich reizlose Wundverhältnisse

[Mobilisation des Patienten war wie vor Operation möglich](#)

[Der Kostaufbau des Patienten erfolgte zeitgerecht](#)

Suffiziente Darmpassage seit 29.05.2042; [Erbrechen und Übelkeit ab Tag 1 postoperativ und über den dritten Tag postoperativ hinaus; postoperative Magensonde vorhanden, postoperative Magensonde wurde entfernt am 03.06.2042; Delayed Gastric Emptying \(DGE\) A \(ISGPS 2007\)](#)

[Sonstige Auffälligkeiten: Nebenfundlich wurde ein Lymphangiom im Resektat gefunden, welches keinen weiteren Handlungsbedarf erfordert.](#) Am 10. postoperativen Tag kam es zu erneut Ansteigen der Infektwerten ohne klinisches Korrelat

Entlassungsdatum: 09.06.2042

## Generated Discharge Summary

### Anamnese und Befund:

Die 70-jährige Patientin wurde am 07.08.2028 mit einer Verdachtsdiagnose eines resektable duktales Adenokarzinoms des Pankreas (PDAC) vorgestellt. Die Patientin hatte einen ungewollten Gewichtsverlust von 4 kg in 2 Wochen und Ikterus seit 08/2028. Die Endoskopisch retrograde Cholangiopankreatikographie (ERCP) am 04.09.2028 zeigte eine Stenose des Gallengangs, weshalb ein Gallengangsstent eingelegt wurde. Die Laborwerte zeigten erhöhte Werte für Carbohydrat-Antigen 19-9 (CA 19-9), Bilirubin gesamt, Alkalische Phosphatase (AP) und Gamma-glutamyl Transferase (GGT). Die radiologische Untersuchung bestätigte die Verdachtsdiagnose eines duktales Adenokarzinoms des Pankreas (PDAC).

### Therapie und Verlauf:

Die Patientin wurde am 16.09.2028 stationär aufgenommen und am 17.09.2028 einer pylorus erhaltenden Whipple-Operation unterzogen. Intraoperativ wurden Easy-Flow- und Robinson-Drainagen eingelegt, die am 22.09. und 23.09.2028 entfernt wurden. Die intraoperative Bewertung des Pankreasparenchyms/-gewebes zeigte ein nicht lipomatöses Pankreas. Die Patientin verlor 900 ml Blut während der Operation und erhielt postoperativ Antibiotika. Nach der Operation wurde die Patientin in das Aufwachraum verlegt und zeitnah auf die Normalstation verlegt. Die stationäre antibiotische Therapie bestand aus Ceftriaxon/Metronidazol i.v. von 16.09.2028 bis 19.09.2028. Die Schmerztherapie erfolgte mit Opioiden p.o. und Regionalanästhesie (inkl. Periduralanästhesie (PDA)). Weitere Medikation bestand aus Metoclopramid p.o. von 18.09.2028 bis 22.09.2028. Der postoperative Verlauf war komplikationslos, die Wundverhältnisse waren reizlos, die Mobilisation des Patienten war wie vor der Operation möglich und der Kostaufbau erfolgte zeitgerecht. Die suffiziente Darmpassage wurde ab 19.09.2028 beobachtet. Die Patientin wurde am 27.09.2028 entlassen.

## EHR Data

### ALLGEMEINE INFORMATIONEN

Geschlecht: weiblich

Geburtsdatum: 12.03.1952

Körpergröße: 165 cm, Körpergewicht: 80 kg

Bekannte Vorerkrankungen: Arterielle Hypertonie

Familienanamnese: Extrapankreatische Krebserkrankungen liegen vor:

-Art der Erkrankung: Darmkrebs, Betroffene Familienmitglieder: Eltern

### INFORMATIONEN VOR OPERATION

Grund des Besuchs: Erstvorstellung; Bauchspeicheldrüsenzyste

Datum der Erstdiagnose: 07.08.2028

Aktuelle Verdachtsdiagnose: Resektables duktales Adenokarzinom des Pankreas (PDAC)

Diagnose histologisch gesichert

Ungewollter Gewichtsverlust: 4 kg in 2 Wochen

Ikterus liegt vor: seit 08/2028

Endoskopisch retrograde Cholangiopankreatikographie liegt vor: Zeitpunkt: 04.09.2028, Anzahl Untersuchungen bisher: 2, ERCP-Stents eingelegt

Laborwerte: Carbohydrat-Antigen 19-9 (CA 19-9): 41.0 U/ml: Wert erhöht; Bilirubin gesamt: 1.18 mg/dl: Wert erhöht; Alkalische Phosphatase (AP): 145.0 U/L: Wert erhöht; Gamma-glutamyl Transferase (GGT): 294.0 U/L: Wert erhöht

Präoperative Behandlung: Gallengangsstent

Radiologischer Befund der Verdachtsdiagnose: Duktales Adenokarzinom des Pankreas (PDAC) / maligne Pankreastumoren, [Resezierbarkeit des Tumors: Resektablel](#)  
Therapieempfehlung: [Explorative Laparotomie](#), Pylorus erhaltende Whipple-Operation

#### INFORMATIONEN ZUR OPERATION

Datum der stationären Aufnahme: 16.09.2028

OP-Datum: 17.09.2028

Diagnose (gesichert): resect. Duktales Adenokarzinom des Pankreas (PDAC)

Art der OP: Pyloruserhaltende Pankreaskopfresektion (ppWhipple), OP-Zugangsmethode: Offene OP

Intraoperative Drainagen: Easy-Flow Drainage: Eingelegt am 17.09.2028, entfernt am 23.09.2028; Ro-

binson Drainage: Eingelegt am 17.09.2028, entfernt am 22.09.2028; [Robinson: Eingelegt am 17.09.2028, entfernt am 22.09.2028](#)

Intraoperative Bewertung des Pankreasparenchyms/-gewebes: Pankreas nicht lipomatös

Sonstige Informationen aus der OP: Blutverlust von 900 ml, Antibiose weiter postoperativ verabreicht

#### STATIONÄRER VERLAUF

Verlegung nach OP in Aufwachraum am 17.09.2028, dann zeitnahe Verlegung auf Normalstation

Stationäre antibiotische Therapie: Gabe von Ceftriaxon/Metronidazol i.v. von 16.09.2028 bis 19.09.2028

Folgende Analgetika wurden verabreicht: Opioide p.o., Regionalanästhesie (inkl. Periduralanästhesie (PDA))

Weitere Medikation: Gabe von Metoclopramid p.o. von 18.09.2028 bis 22.09.2028

[Bildgebung: CT Schnittbild:](#)

[-Indikation: \(Erneuter\) Infektwertanstieg, Infektwertanstieg wurde beobachtet](#)

Es zeigten sich reizlose Wundverhältnisse

Mobilisation des Patienten war wie vor Operation möglich

Der Kostaufbau des Patienten erfolgte zeitgerecht

Suffiziente Darmpassage seit 19.09.2028

Entlassungsdatum: 27.09.2028

#### Summary 6

##### [Generated Discharge Summary](#)

#### Anamnese und Befund:

Die [39-jährige Patientin](#) wurde aufgrund einer Bauchspeicheldrüsenzyste und eines Verdachts auf einen neuroendokrinen Tumor (NET) in unserer Klinik vorgestellt. Die Patientin litt unter chronischen, leichten, rezidivierenden Schmerzen im Oberbauch, die sie wöchentlich auftraten und mit Morphin behandelt wurden. Zudem war ein ungewollter Gewichtsverlust von 2 kg in 6 Wochen zu verzeichnen. Die Laborwerte zeigten eine erhöhte Lipase von 67,0 U/L und eine verminderte alkalische Phosphatase von 51,0 U/L. Eine Punktion mittels endoskopischen Ultraschalls ergab den histologisch gesicherten Befund eines neuroendokrinen Tumors (NET).

#### Therapie und Verlauf:

Die Patientin wurde am 10.10.2027 einer roboter-assistierten Duodenopankreatektomie unterzogen, die aufgrund der intraoperativen Befunde erweitert wurde, um eine multiviszzerale Resektion des Magens durchzuführen. Die Operation verlief ohne Komplikationen. Im Anschluss an die Operation wurde die Patientin auf die Normalstation verlegt und erhielt eine [patientenkontrollierte Analgesie mit](#) Opioiden p.o. sowie Metoclopramid p.o. von 13.10.2027 bis 14.10.2027. Es trat eine Lymphfistel

auf, die durch die Gabe von fettfreier Kost und die Entfernung der Drainage am 20.10.2027 behandelt werden konnte. Die Mobilisation des Patienten war wie vor der Operation möglich, und der Kostaufbau erfolgte zeitgerecht. Die Patientin zeigte suffiziente Darmpassage seit 13.10.2027. Die Entlassung erfolgte am 21.10.2027.

## *EHR Data*

### ALLGEMEINE INFORMATIONEN

Geschlecht: weiblich

Geburtsdatum: 08.04.1978

Vorhergehende abdominelle extrapankreatische OP liegt vor

Alkoholkonsum: Häufigkeit: Wöchentlich

### INFORMATIONEN VOR OPERATION

Grund des Besuchs: Erstvorstellung; Bauchspeicheldrüsenzyste

Aktuelle Verdachtsdiagnose: Neuroendokriner Tumor (NET)

Diagnose histologisch gesichert: Material: Punktion Endoskopischer Ultraschall, Befund: Neuroendokriner Tumor (NET)

Ungewollter Gewichtsverlust: 2 kg in 6 Wochen

Chronische Schmerzen liegen vor: Schmerzcharakter: Leichte Schmerzen, Schmerzverlauf: Rezidivierend, Schmerzfrequenz: Wöchentlich, Schmerzmedikation: Morphin

Laborwerte: Alkalische Phosphatase (AP): 51.0 U/L: Wert zu niedrig; Lipase: 67.0 U/L: Wert erhöht

Therapieempfehlung: Roboter-assistierte Duodenopankreatektomie

### INFORMATIONEN ZUR OPERATION

Datum der stationären Aufnahme: 09.10.2027

OP-Datum: 10.10.2027

Diagnose (gesichert): Neuroendokriner Tumor (NET)

Art der OP: Roboter-assistierte Duodenopankreatektomie, OP-Zugangsmethode: Minimalinvasiver Eingriff (MIC)

OP wurde erweitert: Zusätzliche multiviszzerale Resektion des Magens durchgeführt

Intraoperative Drainagen: Robinson Drainage: Eingelegt am 10.10.2027, entfernt am 20.10.2027

Sonstige Informationen aus der OP: Antibiose nur intraoperativ verabreicht, Besonderheiten: Rekonstruktion mittels E-/S-Pankreaticojejunostomie, E-/S-Hepatikojejunostomie, S-/S-Gastrojejunostomie

### STATIONÄRER VERLAUF

Verlegung nach OP in Aufwachraum am 10.10.2027, dann zeitnahe Verlegung auf Normalstation

Folgende Analgetika wurden verabreicht: Opiode p.o., patientenkontrollierte Analgesie

Weitere Medikation: Gabe von Metoclopramid p.o. von 13.10.2027 bis 14.10.2027

Weitere Komplikationen: Lymphfistel, Begründung: Triglyceride mehr im Sekret

Es zeigten sich reizlose Wundverhältnisse

Mobilisation des Patienten war wie vor Operation möglich

Der Kostaufbau des Patienten erfolgte zeitgerecht

Suffiziente Darmpassage seit 13.10.2027

Sonstige Auffälligkeiten: Nachweis einer Lymphfistel. Die Patientin erhielt dann für 3 Tage fettfreie Kost, worunter die Drainage aufklarte und keine Triglyceride mehr im Sekret nachweisbar waren. Im Belastungstest zeigte sich dann erneut eine Lymphfistel, bei niedrigen Sekretionsmengen konnte die Drainage jedoch im Verlauf entfernt werden

Entlassungsdatum: 21.10.2027

## Summary 7

### Generated Discharge Summary

#### Anamnese und Befund:

Der 43-jährige Patient wurde aufgrund eines Pankreaskarzinoms und einer Bauchspeicheldrüsenzyste in unsere Klinik aufgenommen. Die Erstdiagnose erfolgte am 24.01.2031. Der Patient litt unter einem ungewollten Gewichtsverlust von 15 kg innerhalb von 2 Wochen. Die Laborwerte zeigten eine zu niedrige Amylase von 5,0 U/L. Eine Punktion mittels Endoskopischem Ultraschall ergab einen Befund eines dukalen Adenokarzinoms des Pankreas (PDAC). Der Patient erhielt eine neoadjuvante Chemotherapie über 6 Zyklen, die letzte Chemotherapie fand am 24.03.2031 statt. Der radiologische Befund zeigte ein borderline resektabels duktales Adenokarzinom des Pankreas.

#### Therapie und Verlauf:

Der Patient wurde am 08.05.2031 stationär aufgenommen und am 09.05.2031 einer Exploration unterzogen. Die Operation musste aufgrund lokaler Inoperabilität abgebrochen werden. Intraoperativ wurde ein Easy-Flow Drainage eingelegt, das am 16.05.2031 entfernt wurde. Die Schnellschnittuntersuchung zeigte Lymphknotenmetastasen. Der Patient erhielt Opioide p.o. als Analgetikum und zeigte reizlose Wundverhältnisse. Die Mobilisation des Patienten war wie vor der Operation möglich. Der Kostaufbau des Patienten erfolgte zeitgerecht und eine suffiziente Darmpassage konnte ab dem 12.05.2031 festgestellt werden. Der Patient wurde am 17.05.2031 entlassen.

### EHR Data

#### ALLGEMEINE INFORMATIONEN

Geschlecht: männlich

Geburtsdatum: 27.08.1978

Diabetes mellitus liegt vor seit 10/2029, Insulinpflicht seit 10/2030, Einnahme orale Antidiabetika seit Familienanamnese: Extrapankreatische Krebserkrankungen liegen vor:

-Art der Erkrankung: Darmkrebs, Betroffene Familienmitglieder: Eltern, Alter Erkrankungsbeginn: 60

#### INFORMATIONEN VOR OPERATION

Grund des Besuchs: Pankreaskarzinom, Bauchspeicheldrüsenzyste

Datum der Erstdiagnose: 24.01.2031

Aktuelle Verdachtsdiagnose: Lokal fortgeschrittenes duktales Adenokarzinom des Pankreas (PDAC)

Diagnose histologisch gesichert: Material: Punktion Endoskopischer Ultraschall, Befund: Duktales Adenokarzinom des Pankreas (PDAC)

Ungewollter Gewichtsverlust: 15 kg in 2 Wochen

Laborwerte: Amylase: 5.0 U/L: Wert zu niedrig

Präoperative Behandlung: Neoadjuvante Therapie: Chemotherapie, Anzahl Zyklen: 6, Datum letzte Chemotherapie: 24.03.2031

Radiologischer Befund der Verdachtsdiagnose: Duktales Adenokarzinom des Pankreas (PDAC) / maligne Pankreastumoren, Resezierbarkeit des Tumors: Borderline Resektabel

Therapieempfehlung: Exploration

#### INFORMATIONEN ZUR OPERATION

Datum der stationären Aufnahme: 08.05.2031

OP-Datum: 09.05.2031

Diagnose (gesichert): borderline Duktales Adenokarzinom des Pankreas (PDAC)

Art der OP: Expl + PE, OP wurde abgebrochen: Grund: Lokale Inoperabilität, OP-Zugangsmethode: Minimalinvasiver Eingriff (MIC)

Intraoperative Drainagen: Easy-Flow Drainage: Eingelegt am 09.05.2031, entfernt am 16.05.2031

Schnellschnitt auffällig: In einer durchgeführten Schnellschnittuntersuchung zeigten sich Lymphknotenmetastasen.

Sonstige Informationen aus der OP: Blutverlust von 200 ml, Antibiose nur intraoperativ verabreicht, Besonderheiten: Aufgrund des sehr ausgedehnten Befundes wurde die Operation nach einer Cholezystektomie beendet.

#### STATIONÄRER VERLAUF

Verlegung nach OP in Aufwachraum am 09.05.2031, dann zeitnahe Verlegung auf Normalstation

Folgende Analgetika wurden verabreicht: Opioide p.o.

Es zeigten sich reizlose Wundverhältnisse

Mobilisation des Patienten war wie vor Operation möglich

Der Kostaufbau des Patienten erfolgte zeitgerecht

Suffiziente Darmpassage seit 12.05.2031

Entlassungsdatum: 17.05.2031

#### Summary 8

##### *Generated Discharge Summary*

#### Anamnese und Befund:

Der 42-jährige Patient wurde am 15.04.2046 erstmals vorstellig, weil er unter akuter Pankreatitis und einer Bauchspeicheldrüsenzyste litt. Der Patient berichtete über einen ungewollten Gewichtsverlust von 5 kg innerhalb von 16 Wochen und über chronische Schmerzen seit 16 Wochen, die als leichte, rezidivierende Schmerzen beschrieben wurden. Der Patient gab an, täglich unter Schmerzen zu leiden. Darüber hinaus bestanden Verdauungsprobleme mit einer Stuhlzahl von 1 pro Tag und Erbrechen. Die Laborwerte zeigten erhöhte Werte für Carcinoembryonales Antigen (CEA) und Bilirubin gesamt. Aufgrund dieser Befunde wurde eine explorative Laparotomie empfohlen.

#### Therapie und Verlauf:

Der Patient wurde am 22.08.2046 stationär aufgenommen und am 23.08.2046 einer Pankreaslinksresektion unterzogen. Intraoperativ wurde eine Robinson-Drainage eingelegt, die am 30.08.2046 entfernt wurde. Die intraoperative Bewertung des Pankreasparenchyms zeigte eine harte Textur und eine dicke Konsistenz. Der Patient wurde nach der Operation in das Aufwachraum verlegt und zeitnah auf die Normalstation verlegt. Während des stationären Aufenthalts erhielt der Patient Analgetika in Form von Opioiden p.o. und i.v. sowie patientenkontrollierte Analgesie. Die Wundverhältnisse waren reizlos, die Mobilisation des Patienten war wie vor der Operation möglich, und der Kostaufbau erfolgte zeitgerecht. Der Patient zeigte suffiziente Darmpassage ab dem 27.08.2046, während Erbrechen und Übelkeit bis zum dritten Tag postoperativ auftraten. Der Patient wurde am 01.09.2046 entlassen.

#### *EHR Data*

#### ALLGEMEINE INFORMATIONEN

Geschlecht: männlich

Geburtsdatum: 13.05.2004

Familienanamnese: Extrapankreatische Krebserkrankungen liegen vor:



-Art der Erkrankung: Schilddrüse, Betroffene Familienmitglieder: Eltern, Alter Erkrankungsbeginn: 55  
Alkoholkonsum: Häufigkeit: Wöchentlich

#### INFORMATIONEN VOR OPERATION

Grund des Besuchs: Erstvorstellung; Akute Pankreatitis, Bauchspeicheldrüsenzyste

Datum der Erstdiagnose: 15.04.2046

Aktuelle Verdachtsdiagnose: Neuroendokriner Tumor (NET)

Diagnose histologisch nicht gesichert

Ungewollter Gewichtsverlust: 5 kg in 16 Wochen

Chronische Schmerzen liegen vor: Beschwerdedauer: Seit 16 Wochen, Schmerzcharakter: Leichte Schmerzen, Schmerzverlauf: Rezidivierend, Schmerzfrequenz: Täglich

Verdauung: Anzahl Stuhlgänge pro Tag: 1, Erbrechen liegt vor

Akute Pankreatitis liegt vor seit 04/2046, Anzahl Schübe: 1, davon wurden 1 im Krankenhaus behandelt

Laborwerte: Carcinoembryonales Antigen (CEA): 2.6 mikrogramm/L: Wert erhöht; Bilirubin gesamt: 1.94 mg/dl: Wert erhöht

Therapieempfehlung: Explorative Laparotomie

#### INFORMATIONEN ZUR OPERATION

Datum der stationären Aufnahme: 22.08.2046

OP-Datum: 23.08.2046

Diagnose (gesichert): Neuroendokriner Tumor (NET)

Art der OP: Pankreaslinksresektion, OP-Zugangsmethode: Offene OP

Intraoperative Drainagen: Robinson Drainage: Eingelegt am 23.08.2046, entfernt am 30.08.2046

Intraoperative Bewertung des Pankreasparenchyms/-gewebes: Textur: Hart, Dicke: Dick, Pankreas nicht lipomatös

Sonstige Informationen aus der OP: Antibiose nur intraoperativ verabreicht

#### STATIONÄRER VERLAUF

Verlegung nach OP in Aufwachraum am 23.08.2046, dann zeitnahe Verlegung auf Normalstation

Folgende Analgetika wurden verabreicht: Opiode p.o., Opiode i.v., patientenkontrollierte Analgesie

Es zeigten sich reizlose Wundverhältnisse

Mobilisation des Patienten war wie vor Operation möglich

Der Kostaufbau des Patienten erfolgte zeitgerecht

Suffiziente Darmpassage seit 27.08.2046; Erbrechen und Übelkeit ab Tag 1 postoperativ und über den dritten Tag postoperativ hinaus

Entlassungsdatum: 01.09.2046

Summary 9

#### Generated Discharge Summary

Anamnese und Befund:

Der 60-jährige Patient wurde aufgrund einer akuten Pankreatitis, eines Pankreaskarzinoms, einer intraduktalen papillär muzinösen Neoplasie (IPMN) und einer Bauchspeicheldrüsenzyste stationär aufgenommen. Die Erstdiagnose erfolgte am 03.04.2045. Der Patient litt unter stark schwankenden Schmerzen im Oberbauch seit 12 Monaten, die täglich auftraten und mit Morphin behandelt wurden. Es bestand ein ungewollter Gewichtsverlust von 30 kg in 24 Wochen. Die Verdauung war beeinträchtigt, mit Durchfall und Erbrechen. Der Patient nahm seit 04/2045 Pankreasenzyme ein. Die Laborwerte zeigten erhöhte Werte für Carbohydrat-Antigen 19-9 (CA 19-9), Alkalische Phosphatase



(AP) und Gamma-glutamyl Transferase (GGT). Eine Endoskopisch retrograde Cholangiopankreatikographie wurde am 12.02.2045 durchgeführt. Der Patient erhielt eine neoadjuvante Chemotherapie mit 6 Zyklen, die am 25.09.2045 abgeschlossen wurde.

#### Therapie und Verlauf:

Der Patient wurde am 12.10.2045 stationär aufgenommen und am 13.10.2045 einer explorativen Laparotomie und einer totalen Pankreatektomie unterzogen. Die Operation wurde erweitert, um eine multiviszerales Resektion des Magens durchzuführen. Intraoperative Drainagen wurden eingelegt und am 25.10.2045 entfernt. Der Patient erhielt eine antibiotische Therapie und eine Schmerztherapie mit verschiedenen Analgetika. Es kam zu einer **Isolierung eines CRP-Anstiegs** und reizlosen Wundverhältnissen. Der Patient wurde auf die Intermediate Care Station (IMC) verlegt und erhielt eine parenterale Ernährungstherapie, um eine adäquate Kalorienaufnahme zu gewährleisten. Der Patient wurde am 30.10.2045 entlassen.

#### EHR Data

##### ALLGEMEINE INFORMATIONEN

Geschlecht: männlich

Geburtsdatum: 30.07.1985

Bekannte Vorerkrankungen: Arterielle Hypertonie, Koronare Herzkrankheit (KHK)

Diabetes mellitus liegt vor seit 09/2043

Vorliegende Veränderungen: Kolonpolypen (Erstdiagnose: 09/2045)

Raucherstatus: Raucher: Seit 30 Jahren, Zigaretten pro Tag: 10

Alkoholkonsum: Häufigkeit: Nie

##### INFORMATIONEN VOR OPERATION

Grund des Besuchs: Akute Pankreatitis, Pankreaskarzinom, Intraduktale papillär muzinöse Neoplasien (IPMN), Bauchspeicheldrüsenzyste

Datum der Erstdiagnose: 03.04.2045

**Aktuelle Verdachtsdiagnose: Resektables duktales Adenokarzinom des Pankreas (PDAC)**

Diagnose histologisch nicht gesichert

Ungewollter Gewichtsverlust: 30 kg in 24 Wochen

Chronische Schmerzen liegen vor: Beschwerdedauer: Seit 12 Monaten, Schmerzcharakter: Stark schwankende Schmerzen, Schmerzverlauf: Rezidivierend, Schmerzfrequenz: Täglich, Schmerzmedikation: Morphin

Verdauung: Anzahl Stuhlgänge pro Tag: 10, Durchfall liegt vor, Erbrechen liegt vor, Einnahme von Pankreasenzymen: seit 04/2045

**Akute Pankreatitis liegt vor seit 04/2045**

Endoskopisch retrograde Cholangiopankreatikographie liegt vor: Zeitpunkt: 12.02.2045, Anzahl Untersuchungen bisher: 1

Übelkeit liegt in letzter Zeit vor

Laborwerte: Carbohydrat-Antigen 19-9 (CA 19-9): 42.0 U/ml: Wert erhöht; Alkalische Phosphatase (AP): 119.0 U/L: Wert erhöht; Gamma-glutamyl Transferase (GGT): 105.0 U/L: Wert erhöht

Vorhergehende Pankreas-OP: DHC Stent Einlage, Datum der OP: 03.04.2045

Präoperative Behandlung: Gallengangsstent, Neoadjuvante Therapie: Chemotherapie, Anzahl Zyklen: 6, Vollständigkeit der Chemotherapie: Vollständig, Datum letzte Chemotherapie: 25.09.2045

**Radiologischer Befund der Verdachtsdiagnose: Duktales Adenokarzinom des Pankreas (PDAC) / maligne Pankreastumoren, Resezierbarkeit des Tumors: Resektablel**

Therapieempfehlung: Explorative Laparotomie, Totale Pankreatektomie

## INFORMATIONEN ZUR OPERATION

Datum der stationären Aufnahme: 12.10.2045

OP-Datum: 13.10.2045

Diagnose (gesichert): resect. Duktales Adenokarzinom des Pankreas (PDAC)

Art der OP: Totale Pankreatektomie, OP-Zugangsmethode: Offene OP

OP wurde erweitert: Zusätzliche multiviszerales Resektion des Magens durchgeführt

Intraoperative Drainagen: Easy-Flow Drainage: Eingelegt am 13.10.2045, entfernt am 25.10.2045

Zusätzliche Gefäßresektion: Pfortader Interponat: Sonstiges, Divestment Arteria Mesenterica Superior, Divestment Truncus Coeliacus, Arterielle OP: Traingle OP

Sonstige Informationen aus der OP: Transfusion gegeben, Blutverlust von 800 ml, Antibiose weiter postoperativ verabreicht

## STATIONÄRER VERLAUF

Verlegung nach OP in Aufwachraum am 13.10.2045, Verlegung auf Intermediate Care Station (IMC)

Stationäre antibiotische Therapie: Gabe von Ceftriaxon/Metronidazol i.v. von 12.10.2045 bis

16.10.2045, Indikation: Perioperative Antibiose; Gabe von Piperacillin/Tazobactam i.v. von

24.10.2045 bis 29.10.2045, Indikation: Verdacht ZVK Infektion

Folgende Analgetika wurden verabreicht: Nicht steroidale Antirheumatika (NSAID), Opiode p.o., Opiode i.v., patientenkontrollierte Analgesie, Regionalanästhesie (inkl. Periduralanästhesie (PDA))

Bildgebung: CT Schnittbild:

-Indikation: (Erneuter) Infektwertanstieg, Behandlung durch Gabe von Antibiotika

Weitere Komplikationen: Isolierter CRP Anstieg

Es zeigten sich reizlose Wundverhältnisse

Mobilisation des Patienten war wie vor Operation möglich

Der Kostenaufbau des Patienten erfolgte zeitgerecht

Suffiziente Darmpassage seit 17.10.2045; Erbrechen und Übelkeit ab Tag 1 postoperativ und über den dritten Tag postoperativ hinaus

Sonstige Auffälligkeiten: führten zusätzlich zur Vollkost eine parenterale Ernährungstherapie mit Olimel 1500 ml/d weiter, um eine adäquate Kalorienaufnahme zu gewährleisten und eine post-operative katabole Stoffwechsellaage zu vermeiden

Entlassungsdatum: 30.10.2045

Summary 10

## Generated Discharge Summary

### Anamnese und Befund:

Der 47-jährige Patient wurde aufgrund einer Verdachtsdiagnose eines Neuroendokrinen Tumors (NET) in unserem Haus aufgenommen. Die Erstdiagnose erfolgte am 12.05.2034. Der Patient litt unter einem ungewollten Gewichtsverlust von 7 kg innerhalb von 2 Wochen und einer akuten Pankreatitis seit April 2034, die zweimal aufgetreten ist, wobei ein Schub im Krankenhaus behandelt wurde. Die Laborwerte zeigten eine erhöhte Lipase von 64,0 U/L. Vor der Operation erhielt der Patient eine neoadjuvante Chemotherapie über 4 Zyklen, die am 25.07.2034 abgeschlossen wurde. Die histologische Sicherung der Diagnose erfolgte durch eine Primarius-Probenentnahme.

### Therapie und Verlauf:

Der Patient wurde am 24.08.2034 stationär aufgenommen und am 26.08.2034 einer explorativen Laparotomie, einer totalen Pankreatektomie, einer Splenektomie und einer Cholezystektomie unterzogen. Aufgrund lokaler Inoperabilität musste die Operation abgebrochen werden. Es wurden

zusätzliche Leber- und Dünndarmresektionen durchgeführt. Intraoperativ wurde eine Spüldrainage eingelegt, die am 07.09.2034 entfernt wurde. Der Patient erhielt eine Transfusion aufgrund eines Blutverlustes von 1800 ml. Postoperativ wurde der Patient auf die Intermediate Care Station (IMC) verlegt. Es wurden Metoclopramid und Erythromycin verabreicht. Der Patient zeigte reizlose Wundverhältnisse und eine zeitgerechte Mobilisation war möglich. Es traten Erbrechen und Übelkeit nach Tag 3 postoperativ auf. Am zweiten postoperativen Tag wurde eine Ösophago-Gastro-Duodenoskopie durchgeführt, die eine Stauungsgastritis und ein Anastomosens-Ulkus ohne Blutungszeichen zeigte. Daraufhin wurde eine hochdosierte PPI Therapie eingeleitet. Es gab Schwierigkeiten bei der Einstellung der Blutzuckerwerte. Der Patient wurde am 08.09.2034 entlassen.

### *EHR Data*

#### ALLGEMEINE INFORMATIONEN

Geschlecht: männlich

Geburtsdatum: 11.12.1986

Familienanamnese: Extrapankreatische Krebserkrankungen liegen vor:

-Art der Erkrankung: Hautkrebs / Tumor Gesichtsnerv, Betroffene Familienmitglieder: Eltern, Alter Erkrankungsbeginn: 70

#### INFORMATIONEN VOR OPERATION

Grund des Besuchs: Erstvorstellung; Pankreaskarzinom, Bauchspeicheldrüsenzyste

Datum der Erstdiagnose: 12.05.2034

Aktuelle Verdachtsdiagnose: Neuroendokriner Tumor (NET)

Diagnose histologisch gesichert: Material: Primarius-Probenentnahme, Befund: Neuroendokriner Tumor (NET)

Ungewollter Gewichtsverlust: 7 kg in 2 Wochen

Akute Pankreatitis liegt vor seit 04/2034, Anzahl Schübe: 2, davon wurden 1 im Krankenhaus behandelt

Laborwerte: Lipase: 64.0 U/L: Wert erhöht

Präoperative Behandlung: Neoadjuvante Therapie: Chemotherapie, Anzahl Zyklen: 4, Vollständigkeit der Chemotherapie: Vollständig, Datum letzte Chemotherapie: 25.07.2034

Therapieempfehlung: Explorative Laparotomie, totale Pankreatektomie, Splenektomie, Cholezystektomie

#### INFORMATIONEN ZUR OPERATION

Datum der stationären Aufnahme: 24.08.2034

OP-Datum: 26.08.2034

Diagnose (gesichert): Neuroendokriner Tumor (NET)

Art der OP: Pankreaslinksresektion, OP wurde abgebrochen: Grund: Lokale Inoperabilität, OP-Zugangsmethode: Offene OP

OP wurde erweitert: Zusätzliche Leberresektion durchgeführt, Zusätzliche multiviszerales Resektion des Dünndarms durchgeführt

Intraoperative Drainagen: Spüldrainage: Eingelegt am 26.08.2034, entfernt am 07.09.2034

Zusätzliche Gefäßresektion: Divestment A.Hepatica, Divestment Arteria Mesenterica Superior, Divestment Truncus Coeliacus

Sonstige Informationen aus der OP: Transfusion gegeben, Blutverlust von 1800 ml, Antibiose nur intraoperativ verabreicht

#### STATIONÄRER VERLAUF

Verlegung nach OP in Aufwachraum am 24.08.2034, Verlegung auf Intermediate Care Station (IMC)  
Weitere Medikation: Gabe von Metoclopramid i.v. von 03.09.2034 bis 06.09.2034; Gabe von Erythromycin i.v. von 04.09.2034 bis 06.09.2034

Es zeigten sich reizlose Wundverhältnisse

Mobilisation des Patienten war wie vor Operation möglich

Der Kostaufbau des Patienten erfolgte zeitgerecht

Erbrechen und Übelkeit nach Tag 3 postoperativ

Sonstige Auffälligkeiten: am zweiten postoperativen Tag eine Ösophago-Gastro-Duodenoskopie zum Ausschluss einer Magenischämie durchgeführt wurde. Hier zeigte sich eine Stauungsgastritis und ein Anastomosen-Ulkus ohne Blutungszeichen, woraufhin eine hochdosierte PPI Therapie eingeleitet wurde. Schwierigkeiten bei der Einstellung der Blutzuckerwerte

Entlassungsdatum: 08.09.2034

Summary 11

### *Generated Discharge Summary*

Anamnese und Befund:

Der 45-jährige Patient wurde am 20.03.2050 in unser Krankenhaus aufgenommen, nachdem er sich am 03.11.2049 erstmals mit einer akuten Pankreatitis vorgestellt hatte. Die chronische Pankreatitis besteht seit März 2048 und war mehrfach hospitalisiert worden. Der Patient ist seit 20 Jahren Raucher und konsumiert täglich 10 Zigaretten. Im Labor zeigten sich erhöhte Werte für Gamma-Glutamyl-Transferase (GGT), Amylase und Lipase. Der radiologische Befund bestätigte die Verdachtsdiagnose einer chronischen Pankreatitis. Aufgrund der Symptome und Befunde wurde eine explorative Laparotomie und eine pylorusresezierende partielle Pankreatico-Duodenektomie mit Anlage einer Pankreatico-Jejunostomie, Hepatico-Jejunostomie und Belassen der Gastrojejunostomie empfohlen.

Therapie und Verlauf:

Der Patient wurde am 21.03.2050 einer pylorusresezierenden Pankreaskopfresektion (prWhipple) unterzogen. Intraoperativ wurde eine Spüldrainage eingelegt, die am 26.03.2050 entfernt wurde. Der Blutverlust während der Operation betrug 500 ml. Postoperativ erhielt der Patient eine antibiotische Therapie mit Ampillicin/Sulbactam und Piperacillin/Tazobactam. Zur Schmerztherapie wurden Opioide p.o. und i.v., patientenkontrollierte Analgesie und Regionalanästhesie (inkl. Periduralanästhesie (PDA)) eingesetzt. Es kam zu einer Pankreas-Fistel (Biochemical Leak, Grade B) und einer Anlage zweier Drainagen. Der Patient zeigte reizlose Wundverhältnisse und eine suffiziente Darmpassage seit dem 24.03.2050. Am 13. postoperativen Tag trat ein erniedrigter Hämoglobinwert von 7,8 g/dl auf, der durch die Transfusion von zwei Erythrozyten-Konzentraten auf 9 g/dl angehoben werden konnte. Der Patient wurde am 11.04.2050 entlassen.

### *EHR Data*

#### ALLGEMEINE INFORMATIONEN

Geschlecht: männlich

Geburtsdatum: 05.02.2005

Vorhergehende abdominelle extrapankreatische OP liegt vor

Raucherstatus: Raucher: Seit 20 Jahren, Zigaretten pro Tag: 10

Alkoholkonsum: Häufigkeit: Nie

#### INFORMATIONEN VOR OPERATION

Grund des Besuchs: Erstvorstellung; Akute Pankreatitis, Chronische Pankreatitis, Bauchspeicheldrüsenszyste

Datum der Erstdiagnose: 03.11.2049

Aktuelle Verdachtsdiagnose: Pankreatitis

[Diagnose histologisch nicht gesichert](#)

Chronische Pankreatitis liegt vor: seit 03/2048, Anzahl Hospitalisierungen: Mehrere

Akute Pankreatitis liegt vor seit 03/2048

Laborwerte: Gamma-glutamyl Transferase (GGT): 56.0 U/L: Wert erhöht; Amylase: 71.0 U/L: Wert erhöht; Lipase: 79.0 U/L: Wert erhöht

Radiologischer Befund der Verdachtsdiagnose: Chronische Pankreatitis

Therapieempfehlung: Explorative Laparotomie, Pylorus-resezierende partielle Pankreatico-Duodenektomie mit Anlage einer Pankreatico-Jejunostomie, Hepatico-Jejunostomie und Belassen der Gastrojejunostomie

#### INFORMATIONEN ZUR OPERATION

[Datum der stationären Aufnahme: 20.03.2050](#)

OP-Datum: 21.03.2050

Diagnose (gesichert): Pankreatitis

Art der OP: Pylorusresezierende Pankreaskopfresektion (prWhipple), OP-Zugangsmethode: Offene OP

Intraoperative Drainagen: Spüldrainage: Eingelegt am 21.03.2050, entfernt am 26.03.2050

[Intraoperative Bewertung des Pankreasparenchyms/-gewebes: Textur: Weich, Position: Mittig,](#)

[Durchmesser: > 3mm, Durchmesser in mm: 4, Pankreas nicht lipomatös](#)

Sonstige Informationen aus der OP: Blutverlust von 500 ml, [Antibiose nur intraoperativ verabreicht](#)

#### STATIONÄRER VERLAUF

Verlegung nach OP in Aufwachraum am 20.03.2050, dann zeitnahe Verlegung auf Normalstation

Stationäre antibiotische Therapie: Gabe von Ampillicin/Sulbactam i.v. von 04.04.2050 bis 07.04.2050,

Indikation: Deeskalation Piperacillin/Tazobactam; Gabe von Piperacillin/Tazobactam i.v. von

28.03.2050 bis 04.04.2050

Folgende Analgetika wurden verabreicht: Opioide p.o., Opioide i.v., patientenkontrollierte Analgesie, Regionalanästhesie (inkl. Periduralanästhesie (PDA))

[Weitere Medikation: Gabe von Erythromycin i.v. von 28.03.2050 bis 31.03.2050](#)

[Bildgebung: CT Schnittbild:](#)

[-Indikation: \(Erneuter\) Infektwertanstieg, Behandlung durch Gabe von Antibiotika](#)

[-Befund: Sonstige Befunde: Anlage zweier Drainagen](#)

Pankreas-Fistel: Biochemical Leak (Grade B)

Es zeigten sich reizlose Wundverhältnisse

Mobilisation des Patienten war wie vor Operation möglich

Suffiziente Darmpassage seit 24.03.2050; [Erbrechen und Übelkeit nach Tag 3 postoperativ; Erneute](#)

[Anlage einer Magensonde notwendig: Magensonde angelegt am 27.03.2050, entfernt am 02.04.2050](#)

Sonstige Auffälligkeiten: Am 13. postoperativen Tag ist der Patient mit einem erniedrigten Hämoglobinwert von 7,8 g/dl mit sinkender Tendenz aufgefallen, weswegen wir zwei Erythrozyten-Konzentrate transfundierten. Daraufhin stieg der Hämoglobinwert auf 9 g/dl.

Entlassungsdatum: 11.04.2050

Summary 12

[Generated Discharge Summary](#)

#### Anamnese und Befund:

Die 66-jährige Patientin wurde am 07.05.2029 stationär aufgenommen, nachdem sie aufgrund eines Pankreaskarzinoms und einer Bauchspeicheldrüsenzyste in unserer Klinik vorgestellt wurde. Die Patientin litt unter Verdauungsstörungen mit einer Stuhlzahl von 1 pro Tag und Erbrechen. Eine neoadjuvante Chemotherapie wurde über 31 Zyklen durchgeführt, die am 25.01.2028 abgeschlossen wurde. Der radiologische Befund zeigte ein duktales Adenokarzinom des Pankreas (PDAC) mit Zeichen einer akuten Pankreatitis. Aufgrund dieser Befunde wurde eine explorative Laparotomie mit partieller Pankreatico-Duodenektomie, Hepatico-Jejunostomie und Duodeno-Jejunostomie empfohlen.

#### Therapie und Verlauf:

Die Patientin wurde am 10.05.2029 einer pylorusresizierenden Pankreaskopfresektion (prWhipple) unterzogen. Intraoperativ wurde ein Easy-Flow Drainage eingelegt, das am 16.05.2029 entfernt wurde. Es kam zu einem Blutverlust von 200 ml. Die Patientin wurde postoperativ auf die Normalstation verlegt und erhielt Opiode p.o. und i.v. sowie patientenkontrollierte Analgesie. Die Wundverhältnisse waren reizlos, die Mobilisation des Patienten war wie vor der Operation möglich und der Kostaufbau erfolgte zeitgerecht. Suffiziente Darmpassage trat ab dem 12.05.2029 auf. Die Patientin wurde am 18.05.2029 entlassen.

#### EHR Data

##### ALLGEMEINE INFORMATIONEN

Geschlecht: weiblich

Geburtsdatum: 10.06.1956

Körpergröße: 165 cm, Körpergewicht: 73 kg

Bekannte Vorerkrankungen: Arterielle Hypertonie

Vorhergehende abdominelle extrapankreatische OP liegt vor

Raucherstatus: Ehemaliger Raucher: Aufgehört am: 07/1995

##### INFORMATIONEN VOR OPERATION

Grund des Besuchs: Pankreaskarzinom, Bauchspeicheldrüsenzyste

Datum der Erstdiagnose: 25.05.2027

Aktuelle Verdachtsdiagnose: Resektables duktales Adenokarzinom des Pankreas (PDAC)

Diagnose histologisch nicht gesichert

Verdauung: Anzahl Stuhlgänge pro Tag: 1, Erbrechen liegt vor

Präoperative Behandlung: Neoadjuvante Therapie: Chemotherapie, Anzahl Zyklen: 31, Vollständigkeit der Chemotherapie: Vollständig, Datum letzte Chemotherapie: 25.01.2028

Radiologischer Befund der Verdachtsdiagnose: Duktales Adenokarzinom des Pankreas (PDAC) / maligne Pankreastumoren, Resezierbarkeit des Tumors: Resektable

Sonstige radiologische Befunde: Zeichen einer akuten Pankreatitis

Therapieempfehlung: Explorative Laparotomie, intraoperative Ultraschall-Untersuchung der Leber, partielle Pankreatico-Duodenektomie mit Anlage einer Pankreatico-Jejunostomie, Hepatico-Jejunostomie und Duodeno-Jejunostomie, Divestment der Arteria mesenterica superior

##### INFORMATIONEN ZUR OPERATION

Datum der stationären Aufnahme: 07.05.2029

OP-Datum: 10.05.2029

Diagnose (gesichert): resect. Duktales Adenokarzinom des Pankreas (PDAC)

Art der OP: Pylorusresizierende Pankreaskopfresektion (prWhipple), OP-Zugangsmethode: Offene OP

Intraoperative Drainagen: Easy-Flow Drainage: Eingelegt am 10.05.2029, entfernt am 16.05.2029

Zusätzliche Gefäßresektion: Divestment Arteria Mesenterica Superior, Arterielle OP: Traingle OP  
Sonstige Informationen aus der OP: Blutverlust von 200 ml, Antibiose nur intraoperativ verabreicht

#### STATIONÄRER VERLAUF

Verlegung nach OP in Aufwachraum am 10.05.2029, dann zeitnahe Verlegung auf Normalstation  
Folgende Analgetika wurden verabreicht: Opioide p.o., Opioide i.v., patientenkontrollierte Analgesie  
Es zeigten sich reizlose Wundverhältnisse  
Mobilisation des Patienten war wie vor Operation möglich  
Der Kostaufbau des Patienten erfolgte zeitgerecht  
Suffiziente Darmpassage seit 12.05.2029  
Entlassungsdatum: 18.05.2029

Summary 13

#### Generated Discharge Summary

##### Anamnese und Befund:

Die 60-jährige Patientin wurde aufgrund eines Verdachts auf ein lokales, fortgeschrittenes duktales Adenokarzinom des Pankreas (PDAC) in unserer Klinik vorgestellt. Die Patientin litt unter chronischen, mittelstarken Schmerzen im Oberbauch seit vier Monaten, die rezidivierend auftraten. Zudem war ein ungewollter Gewichtsverlust von 4 kg in 10 Wochen zu verzeichnen. Die Endoskopisch retrograde Cholangiopankreatikographie (ERCP) vom 16.08.2032 zeigte eine Verdachtsdiagnose auf ein duktales Adenokarzinom des Pankreas (PDAC). Die Laborwerte zeigten erhöhte Werte für Carbohydrat-Antigen 19-9 (CA 19-9), Alkalische Phosphatase (AP) und Gamma-glutamyl Transferase (GGT). Die Patientin erhielt eine neoadjuvante Chemotherapie mit 6 Zyklen, die vollständig durchgeführt wurde.

##### Therapie und Verlauf:

Die Patientin wurde am 06.12.2032 einer radikalen antegrade modularen Pankreatosplenektomie (RAMPS) unterzogen. Intraoperativ wurde eine zusätzliche multiviszzerale Resektion der Nephro durchgeführt. Die OP-Verlauf war komplikationslos, es kam zu einem Blutverlust von 700 ml. Postoperativ erhielt die Patientin eine antibiotische Therapie mit Ampillicin/Sulbactam i.v. von 06.12.2032 bis 09.12.2032. Die Schmerztherapie bestand aus Opioiden p.o. und Regionalanästhesie (inkl. Periduralanästhesie (PDA)). Die Patientin zeigte reizlose Wundverhältnisse und eine suffiziente Darmpassage seit 09.12.2032. Die Mobilisation des Patienten war wie vor der Operation möglich. In einer sonographischen Kontrolle wurde eine Verhaltformation im Oberbauch in der Pankreasloge ohne Septierungen festgestellt, ca. 8 x 4 cm groß. Die Patientin wurde am 22.12.2032 entlassen und zu einer Verlaufskontrolle in 1 Woche wieder eingebestellt.

#### EHR Data

##### ALLGEMEINE INFORMATIONEN

Geschlecht: weiblich

Geburtsdatum: 09.05.1972

Familienanamnese: Pankreaserkrankungen liegen vor:

-Pankreaskarzinom

Familienanamnese: Extrapankreatische Krebserkrankungen liegen vor:

-Art der Erkrankung: Brustkrebs, Betroffene Familienmitglieder: Geschwister, Alter Erkrankungsbeginn: 46

##### INFORMATIONEN VOR OPERATION



Grund des Besuchs: Erstvorstellung; Pankreaskarzinom, Bauchspeicheldrüsenzyste

Datum der Erstdiagnose: 22.07.2032

Aktuelle Verdachtsdiagnose: Lokal fortgeschrittenes duktales Adenokarzinom des Pankreas (PDAC)

Diagnose histologisch gesichert: Befund: Duktales Adenokarzinom des Pankreas (PDAC)

Ungewollter Gewichtsverlust: 4 kg in 10 Wochen

Chronische Schmerzen liegen vor: Beschwerdedauer: Seit 4 Monaten, Schmerzcharakter: Mittelstarke Schmerzen, Schmerzverlauf: Rezidivierend, Schmerzfrequenz: Wöchentlich

Endoskopisch retrograde Cholangiopankreatikographie liegt vor: Zeitpunkt: 16.08.2032, Anzahl Untersuchungen bisher: 1

Laborwerte: Carbohydrat-Antigen 19-9 (CA 19-9): 115.6 U/ml: Wert erhöht; Alkalische Phosphatase (AP): 257.0 U/L: Wert erhöht; Gamma-glutamyl Transferase (GGT): 503.0 U/L: Wert erhöht

Präoperative Behandlung: Neoadjuvante Therapie: Chemotherapie, Anzahl Zyklen: 6, Vollständigkeit der Chemotherapie: Vollständig

Radiologischer Befund der Verdachtsdiagnose: Duktales Adenokarzinom des Pankreas (PDAC) / maligne Pankreastumoren, Resezierbarkeit des Tumors: Lokal fortgeschritten

Therapieempfehlung: Explorative Laparotomie, RAMPS

#### INFORMATIONEN ZUR OPERATION

Datum der stationären Aufnahme: 05.12.2032

OP-Datum: 06.12.2032

Diagnose (gesichert): Lokal fortgeschrittenes Duktales Adenokarzinom des Pankreas (PDAC)

Art der OP: Radikale antegrade modulare Pankreatosplenektomie (RAMPS), OP-Zugangsmethode: Offene OP

OP wurde erweitert: Zusätzliche multiviszzerale Resektion der Nephro durchgeführt

Intraoperative Drainagen: Easy-Flow Drainage: Eingelegt am 06.12.2032, entfernt am 18.12.2032;

Spüldrainage: Eingelegt am 06.12.2032, entfernt am 12.12.2032

Zusätzliche Gefässresektion: Divestment A.Hepatica, Divestment Arteria Mesenterica Superior, Divestment Truncus Coeliacus, Arterielle OP: Traingle OP

Intraoperative Bewertung des Pankreasparenchyms/-gewebes: Textur: Hart, Pankreas nicht lipomatös

Sonstige Informationen aus der OP: Blutverlust von 700 ml, Antibiose weiter postoperativ verabreicht

#### STATIONÄRER VERLAUF

Verlegung nach OP in Aufwachraum am 06.12.2032, dann zeitnahe Verlegung auf Normalstation

Stationäre antibiotische Therapie: Gabe von Ampillicin/Sulbactam i.v. von 06.12.2032 bis 09.12.2032

Folgende Analgetika wurden verabreicht: Opioide p.o., Regionalanästhesie (inkl. Periduralanästhesie (PDA))

Weitere Medikation: Gabe von Metoclopramid p.o. von 11.12.2032 bis 15.12.2032; Gabe von Erythromycin i.v. am 19.11.2023

Es zeigten sich reizlose Wundverhältnisse

Mobilisation des Patienten war wie vor Operation möglich

Der Kostaufbau des Patienten erfolgte zeitgerecht

Suffiziente Darmpassage seit 09.12.2032; Erbrechen und Übelkeit ab Tag 1 postoperativ und über den dritten Tag postoperativ hinaus

Sonstige Auffälligkeiten: in einer sonographischen Kontrolle eine Verhaltformation im Oberbauch in der Pankreasloge ohne Septierungen, ca. 8 x 4 cm gross. Bei klinisch unauffälliger Patientin und niedrigen Infektparametern entschieden wir uns die Patientin zu entlassen und zu einer Verlaufskontrolle in 1 Woche wieder einzubestellen



Entlassungsdatum: 22.12.2032

Summary 14

### *Generated Discharge Summary*

#### Anamnese und Befund:

Die 45-jährige Patientin wurde am 05.04.2037 erstmals in unserer Klinik vorgestellt, nachdem sie unter akuten Bauchschmerzen litt. Die Anamnese ergab eine chronische Pankreatitis, die konservativ behandelt wurde. Es bestand der Verdacht auf ein resektables duktales Adenokarzinom des Pankreas (PDAC), was durch radiologische Befunde unterstützt wurde. Die Patientin hatte eine Voroperation wegen einer extrapankreatischen OP. Sie ist ehemaliger Raucher und hat eine arterielle Hypertonie.

#### Therapie und Verlauf:

Die Patientin wurde am 25.05.2037 stationär aufgenommen und am 26.05.2037 einer explorativen Laparotomie unterzogen. Intraoperativ wurde ein resektables duktales Adenokarzinom des Pankreas (PDAC) diagnostiziert. Die Operation musste jedoch aufgrund einer ausgedehnten Kollateralisierung und Pfortaderthrombose abgebrochen werden. Die Patientin erhielt eine Transfusion und hatte einen Blutverlust von 500 ml. Postoperativ wurde sie auf die Normalstation verlegt und erhielt Analgetika in Form von Opioiden p.o., patientenkontrollierter Analgesie und Regionalanästhesie. Es zeigten sich reizlose Wundverhältnisse und der Kostaufbau des Patienten erfolgte zeitgerecht. Die Patientin litt unter Erbrechen und Übelkeit ab Tag 1 postoperativ und über den dritten Tag postoperativ hinaus. Sie erhielt Metoclopramid i.v. von 29.05.2037 bis 31.05.2037. Die Patientin wurde am 02.06.2037 entlassen.

### *EHR Data*

#### ALLGEMEINE INFORMATIONEN

Geschlecht: weiblich

Geburtsdatum: 02.04.1992

Körpergröße: 168 cm, Körpergewicht: 48 kg

Bekannte Vorerkrankungen: Arterielle Hypertonie

Vorhergehende abdominelle extrapankreatische OP liegt vor

Raucherstatus: Ehemaliger Raucher: Anzahl Jahre: 28, Zigaretten pro Tag: 8

Alkoholkonsum: Häufigkeit: Nie

#### INFORMATIONEN VOR OPERATION

Grund des Besuchs: Erstvorstellung; Akute Pankreatitis, Chronische Pankreatitis, Bauchspeicheldrüsenszyste

Datum der Erstdiagnose: 05.04.2037

Aktuelle Verdachtsdiagnose: Resektales duktales Adenokarzinom des Pankreas (PDAC)

Diagnose histologisch nicht gesichert

Chronische Pankreatitis liegt vor: Art der Intervention: Konservativ

Akute Pankreatitis liegt vor

Radiologischer Befund der Verdachtsdiagnose: Duktales Adenokarzinom des Pankreas (PDAC) / maligne Pankreastumoren, Resezierbarkeit des Tumors: Resektabel

Sonstige radiologische Befunde: Zeichen einer akuten Pankreatitis

Therapieempfehlung: Explorative Laparotomie

#### INFORMATIONEN ZUR OPERATION

Datum der stationären Aufnahme: 25.05.2037

OP-Datum: 26.05.2037

Diagnose (gesichert): resect. Duktales Adenokarzinom des Pankreas (PDAC)

Art der OP: Expl + PE, OP wurde abgebrochen: Grund: ausgedehnter Kollateralisierung und Pfortaderthrombose, OP-Zugangsmethode: Offene OP

Intraoperative Drainagen: Easy-Flow Drainage

Sonstige Informationen aus der OP: Transfusion gegeben, Blutverlust von 500 ml, Antibiose nur intraoperativ verabreicht

#### STATIONÄRER VERLAUF

Verlegung nach OP in Aufwachraum am 26.05.2037, dann zeitnahe Verlegung auf Normalstation

Folgende Analgetika wurden verabreicht: Opiode p.o., patientenkontrollierte Analgesie, Regionalanästhesie (inkl. Periduralanästhesie (PDA))

Weitere Medikation: Gabe von Metoclopramid i.v. von 29.05.2037 bis 31.05.2037

Es zeigten sich reizlose Wundverhältnisse

Der Kostaufbau des Patienten erfolgte zeitgerecht

Erbrechen und Übelkeit ab Tag 1 postoperativ und über den dritten Tag postoperativ hinaus

Entlassungsdatum: 02.06.2037

Summary 15

#### Generated Discharge Summary

Anamnese und Befund:

Der 59-jährige Patient wurde aufgrund einer Kontrolle ohne Bauchspeicheldrüsenoperation und einer Bauchspeicheldrüsenzyste in unsere Klinik aufgenommen. Die Verdachtsdiagnose eines Neuroendokrinen Tumors (NET) bestand seit der Erstdiagnose am 08.01.2039. Eine Endoskopisch retrograde Cholangiopankreatikographie (ERCP) wurde am 07.04.2038 durchgeführt. Die Laborwerte zeigten eine erhöhte Gamma-glutamyl Transferase (GGT) von 56.0 U/L. Die Therapieempfehlung lautete auf Pankreasschwanz-Enukleation.

Therapie und Verlauf:

Der Patient wurde am 03.02.2039 stationär aufgenommen und am 04.02.2039 einer minimalinvasiven Enukleation unterzogen. Der Blutverlust während der Operation betrug 100 ml. Antibiotika wurden nur intraoperativ verabreicht. Nach der Operation wurde der Patient in den Aufwachraum verlegt und zeitnah auf die Normalstation verlegt. Die Wundverhältnisse waren reizlos, die Mobilisation des Patienten war wie vor der Operation möglich und der Kostaufbau erfolgte zeitgerecht. Eine suffiziente Darmpassage konnte ab dem 05.02.2039 festgestellt werden. Der Patient wurde am 10.02.2039 entlassen.

#### EHR Data

##### ALLGEMEINE INFORMATIONEN

Geschlecht: männlich

Geburtsdatum: 01.12.1983

Körpergröße: 180 cm, Körpergewicht: 126 kg

Bekannte Vorerkrankungen: Arterielle Hypertonie

Diabetes mellitus liegt vor seit 08/2034, Einnahme orale Antidiabetika seit 08/2034

Vorhergehende abdominelle extrapankreatische OP liegt vor

Familienanamnese: Extrapankreatische Krebserkrankungen liegen vor:

-Art der Erkrankung: Brustkrebs, Betroffene Familienmitglieder: Eltern

Raucherstatus: Ehemaliger Raucher: Aufgehört am: 03/2015, Anzahl Jahre: 15, Zigaretten pro Tag: 20

#### INFORMATIONEN VOR OPERATION

Grund des Besuchs: Kontrolle (ohne Bauchspeicheldrüsenoperation); Bauchspeicheldrüsenzyste

Datum der Erstdiagnose: 08.01.2039

Aktuelle Verdachtsdiagnose: Neuroendokriner Tumor (NET)

Diagnose histologisch nicht gesichert

Endoskopisch retrograde Cholangiopankreatikographie liegt vor: Zeitpunkt: 07.04.2038, Anzahl Untersuchungen bisher: 1

Laborwerte: Gamma-glutamyl Transferase (GGT): 56.0 U/L: Wert erhöht

Therapieempfehlung: Pankreasschwanz-Enukleation

#### INFORMATIONEN ZUR OPERATION

Datum der stationären Aufnahme: 03.02.2039

OP-Datum: 04.02.2039

Diagnose (gesichert): Neuroendokriner Tumor (NET)

Art der OP: Enukleation, OP-Zugangsmethode: Minimalinvasiver Eingriff (MIC)

Sonstige Informationen aus der OP: Blutverlust von 100 ml, Antibiose nur intraoperativ verabreicht

#### STATIONÄRER VERLAUF

Verlegung nach OP in Aufwachraum am 03.02.2039, dann zeitnahe Verlegung auf Normalstation

Es zeigten sich reizlose Wundverhältnisse

Mobilisation des Patienten war wie vor Operation möglich

Der Kostaufbau des Patienten erfolgte zeitgerecht

Suffiziente Darmpassage seit 05.02.2039

Entlassungsdatum: 10.02.2039

Summary 16

#### Generated Discharge Summary

##### Anamnese und Befund:

Die 40-jährige Patientin wurde am 19.11.2048 erstmals vorstellig, da sie eine Bauchspeicheldrüsenzyste aufwies. Im Rahmen der Diagnostik wurde eine Verdachtsdiagnose auf einen Neuroendokrinen Tumor (NET) am Pankreasschwanz gestellt, die jedoch histologisch nicht gesichert werden konnte. Die Patientin litt unter Verdauungsstörungen mit täglich einem Stuhlgang und Durchfall, zudem trat Übelkeit in letzter Zeit auf. Der Laborwert der Neuronenspezifischen Enolase (NSE) lag mit 23,1 mikrogramm/L erhöht vor. Aufgrund dieser Befunde wurde eine da Vinci-assistierte Enukleation eines NET-Tumors am Pankreasschwanz und eine Cholezystektomie empfohlen.

##### Therapie und Verlauf:

Die Patientin wurde am 17.08.2049 stationär aufgenommen und am 18.08.2049 einer da Vinci-assistierten Enukleation eines NET-Tumors am Pankreasschwanz unterzogen. Die Operation wurde minimalinvasiv durchgeführt und musste erweitert werden. Der Blutverlust betrug 150 ml, Antibiotika wurden nur intraoperativ verabreicht. Nach der Operation wurde die Patientin in das Aufwachraum verlegt und zeitnah auf die Normalstation überführt. Im Verlauf der stationären Behandlung erhielt die Patientin Analgetika in Form von Opioiden p.o. und patientenkontrollierter Analgesie. Zudem wurde Metoclopramid p.o. von 21.08.2049 bis 22.08.2049 und i.v. am 02.12.2023 verabreicht. Die

Wundverhältnisse waren reizlos, die Mobilisation des Patienten war wie vor der Operation möglich und der Kostaufbau erfolgte zeitgerecht. Die Darmpassage war seit 20.08.2049 suffizient, Erbrechen und Übelkeit traten ab Tag 1 postoperativ und über den dritten Tag postoperativ hinaus auf. Bei erhöhten Blutdrücken wurde die antihypertensive Medikation angepasst, insbesondere die zusätzliche morgendliche Gabe von Candesartan.

### *EHR Data*

#### ALLGEMEINE INFORMATIONEN

Geschlecht: weiblich

Geburtsdatum: 28.03.2009

Körpergröße: 160 cm, Körpergewicht: 96 kg

Bekannte Vorerkrankungen: Arterielle Hypertonie, FNH, Fettleber

Vorliegende Veränderungen: Kolonpolypen, Ovarialzysten

Weitere Tumorerkrankungen (nicht am Pankreas):

-NFH in der Leber: Therapie: Absetzen der Pille

Vorhergehende abdominelle extrapankreatische OP liegt vor

Familienanamnese: Extrapankreatische Krebserkrankungen liegen vor:

-Art der Erkrankung: Darmkrebs (nicht vererbbar wurde untersucht), Betroffene Familienmitglieder: Eltern, Alter Erkrankungsbeginn: 50

-Art der Erkrankung: Brust, Betroffene Familienmitglieder: Cousine, Alter Erkrankungsbeginn: 40

-Art der Erkrankung: Lunge, Betroffene Familienmitglieder: Onkel,

-Art der Erkrankung: Haut, Betroffene Familienmitglieder: Tante

#### INFORMATIONEN VOR OPERATION

Grund des Besuchs: Erstvorstellung; Bauchspeicheldrüsenzyste

Datum der Erstdiagnose: 19.11.2048

Aktuelle Verdachtsdiagnose: Neuroendokriner Tumor (NET)

Diagnose histologisch nicht gesichert

Verdauung: Anzahl Stuhlgänge pro Tag: 1, Durchfall liegt vor

Übelkeit liegt in letzter Zeit vor

Laborwerte: Neuronenspezifische Enolase (NSE): 23.1 mikrogramm/L: Wert erhöht

Therapieempfehlung: da Vinci-assistierte Enukleation eines NET-Tumors am Pankreasschwanz, Cholezystektomie

#### INFORMATIONEN ZUR OPERATION

Datum der stationären Aufnahme: 17.08.2049

OP-Datum: 18.08.2049

Diagnose (gesichert): Neuroendokriner Tumor (NET)

Art der OP: Enukleation, OP-Zugangsmethode: Minimalinvasiver Eingriff (MIC)

OP wurde erweitert

Sonstige Informationen aus der OP: Blutverlust von 150 ml, Antibiose nur intraoperativ verabreicht

#### STATIONÄRER VERLAUF

Verlegung nach OP in Aufwachraum am 18.08.2049, dann zeitnahe Verlegung auf Normalstation

Folgende Analgetika wurden verabreicht: Opiode p.o., patientenkontrollierte Analgesie

Weitere Medikation: Gabe von Metoclopramid p.o. von 21.08.2049 bis 22.08.2049; Gabe von Metoclopramid i.v. am 02.12.2023

Es zeigten sich reizlose Wundverhältnisse

Mobilisation des Patienten war wie vor Operation möglich

Der Kostaufbau des Patienten erfolgte zeitgerecht

Suffiziente Darmpassage seit 20.08.2049; Erbrechen und Übelkeit ab Tag 1 postoperativ und über den dritten Tag postoperativ hinaus

Sonstige Auffälligkeiten: Bei erhöhten Blutdrücken wurde die antihypertensive Medikation angepasst, insbesondere die zusätzliche morgendliche Gabe von Candesartan. Bei erhöhten Blutdruckwerten wurde bei Unverträglichkeit diverser Blutdruckmedikation eine Einstellung mit 12,5mg HCT begonnen, **welche bei Unverträglichkeit nach 1 Tag eingestellt wurde.**

Entlassungsdatum: 24.08.2049

## Summary 17

### Generated Discharge Summary

#### Anamnese und Befund:

Der 70-jährige Patient wurde am **12.05.2049** erstmals vorstellig mit einer akuten Pankreatitis und Verdacht auf ein Pankreaskarzinom. Der Patient litt unter einem ungewollten Gewichtsverlust von 17 kg in 10 Wochen und **zeigte Ikterus** seit März 2049. Die Laborwerte zeigten erhöhte Werte für Carbohydrat-Antigen 19-9 (CA 19-9), Gamma-glutamyl Transferase (GGT) und Lipase. Eine radiologische Untersuchung ergab den Verdacht auf ein duktales Adenokarzinom des Pankreas (PDAC) mit lokaler Fortgeschrittenheit. Der Patient erhielt eine neoadjuvante Chemotherapie mit 4 Zyklen, die am 11.08.2049 abgeschlossen wurde. **Eine** Gallengangsstent wurde implantiert.

#### Therapie und Verlauf:

Der Patient wurde am 10.04.2050 stationär aufgenommen und am selben Tag einer explorativen Laparotomie unterzogen. Die Operation wurde jedoch aufgrund von Metastasen in der Leber abgebrochen. Intraoperativ wurde eine Robinson-Drainage angelegt und Antibiotika nur intraoperativ verabreicht. Der Patient wurde nach der Operation in den Aufwachraum verlegt und zeitnah auf die Normalstation überführt. Eine stationäre antibiotische Therapie mit Ceftriaxon/Metronidazol wurde von 10.04.2050 bis 17.03.2050 durchgeführt. Der Patient erhielt Opioide p.o. **und patientenkontrollierte** Analgesie. Die Wundverhältnisse waren reizlos, die Mobilisation des Patienten war wie vor der Operation möglich und der Kostaufbau erfolgte zeitgerecht. **Suffiziente** Darmpassage trat seit 13.04.2050 auf. Der Patient wurde am 18.04.2050 entlassen.

### EHR Data

#### ALLGEMEINE INFORMATIONEN

Geschlecht: männlich

Geburtsdatum: 23.10.1979

Körpergröße: 174 cm, Körpergewicht: 78 kg

Diabetes mellitus liegt vor seit 03/2049, Insulinpflicht seit 03/2049

**Raucherstatus:** Raucher: Seit 55 Jahren, Zigaretten pro Tag: 20

#### INFORMATIONEN VOR OPERATION

Grund des Besuchs: Erstvorstellung; Akute Pankreatitis, Pankreaskarzinom, Bauchspeicheldrüsenszyste

Datum der Erstdiagnose: 12.05.2049

Aktuelle Verdachtsdiagnose: Lokal fortgeschrittenes duktales Adenokarzinom des Pankreas (PDAC)

#### Diagnose histologisch nicht gesichert

Ungewollter Gewichtsverlust: 17 kg in 10 Wochen

Ikterus liegt vor: seit 03/2049

Laborwerte: Carbohydrat-Antigen 19-9 (CA 19-9): 75.9 U/ml: Wert erhöht; Gamma-glutamyl Transferase (GGT): 69.0 U/L: Wert erhöht; Lipase: 84.0 U/L: Wert erhöht

Präoperative Behandlung: Gallengangsstent, Neoadjuvante Therapie: Chemotherapie, Anzahl Zyklen: 4, Vollständigkeit der Chemotherapie: Vollständig, Datum letzte Chemotherapie: 11.08.2049

Radiologischer Befund der Verdachtsdiagnose: Duktales Adenokarzinom des Pankreas (PDAC) / maligne Pankreastumoren, Resezierbarkeit des Tumors: Lokal fortgeschritten

Therapieempfehlung: explorativen Laparotomie und gegebenenfalls Whipple-Operation, gegebenenfalls mit Gefäßresektion

#### INFORMATIONEN ZUR OPERATION

Datum der stationären Aufnahme: 10.04.2050

OP-Datum: 10.04.2050

Diagnose (gesichert): Lokal fortgeschrittenes Duktales Adenokarzinom des Pankreas (PDAC)

Art der OP: Exploration und ggf Whipple, OP wurde abgebrochen: Grund: Metastasierung, Lokalisation der Metastasen: Leber; OP-Zugangsmethode: Offene OP

Intraoperative Drainagen: Robinson Drainage

Sonstige Informationen aus der OP: Blutverlust von 50 ml, Antibiose nur intraoperativ verabreicht,

**Besonderheiten:** Bei der Inspektion der Abdominalhöhle fällt eine Infiltration des Leberhilus durch den Tumor auf. . Aufgrund von der Infiltration des Leberhilus ist der Tumor nicht sinnvoll resektabel. Daher kein Fortführen der Pankreasresektion.

#### STATIONÄRER VERLAUF

Verlegung nach OP in Aufwachraum am 10.04.2050, dann zeitnahe Verlegung auf Normalstation

Stationäre antibiotische Therapie: Gabe von Ceftriaxon/Metronidazol i.v. von 10.04.2050 bis 17.03.2050

Folgende Analgetika wurden verabreicht: Opiode p.o., patientenkontrollierte Analgesie

Es zeigten sich reizlose Wundverhältnisse

Mobilisation des Patienten war wie vor Operation möglich

Der Kostaufbau des Patienten erfolgte zeitgerecht

Suffiziente Darmpassage seit 13.04.2050

Entlassungsdatum: 18.04.2050

#### Summary 18

#### Generated Discharge Summary

##### Anamnese und Befund:

Der 57-jährige Patient wurde am 07.04.2031 mit einer akuten Pankreatitis und einer Bauchspeicheldrüsenzyste vorgestellt. Der Patient litt unter einem ungewollten Gewichtsverlust von 8 kg in 5 Wochen und beschrieb Durchfall und Ikterus seit 04/2031. Die endoskopisch retrograde Cholangiopankreatikographie (ERCP) zeigte eine Stenose, die mit ERCP-Stents behandelt wurde. Die Laborwerte zeigten erhöhte Werte für Carcinoembryonales Antigen (CEA), Carbohydrat-Antigen 19-9 (CA 19-9), Bilirubin gesamt, Alkalische Phosphatase (AP), Gamma-glutamyl Transferase (GGT) und Lipase. Der radiologische Befund bestätigte die Verdachtsdiagnose eines lokal fortgeschrittenen dukalen Adenokarzinoms des Pankreas (PDAC).

#### Therapie und Verlauf:

Der Patient wurde am 18.05.2031 stationär aufgenommen und am 19.05.2031 einer explorativen Laparotomie unterzogen. Die Operation wurde als Pylorusresizierende Pankreaskopfresektion (prWhipple) durchgeführt, musste jedoch aufgrund von Metastasen in den Lymphknoten abgebrochen werden. Der Patient wurde nach der Operation in den Aufwachraum verlegt und dann auf die Normalstation überführt. Er erhielt eine antibiotische Therapie mit Ceftriaxon/Metronidazol i.v. von 18.05.2031 bis 21.05.2031. Zur Schmerztherapie wurden **Nicht** steroidale Antirheumatika (NSAID), Opioide p.o. und Regionalanästhesie (inkl. Periduralanästhesie (PDA)) eingesetzt. Der Patient zeigte reizlose Wundverhältnisse und konnte wie vor der Operation mobilisiert werden. Der Kostaufbau des Patienten erfolgte zeitgerecht und die Darmpassage war seit 22.05.2031 suffizient. Der Patient wurde am 24.05.2031 entlassen.

#### EHR Data

##### ALLGEMEINE INFORMATIONEN

Geschlecht: männlich

Geburtsdatum: 30.01.1976

Bekannte Vorerkrankungen: Arterielle Hypertonie

Vorhergehende abdominelle extrapankreatische OP liegt vor

Raucherstatus: Raucher: Seit 40 Jahren, Zigaretten pro Tag: 25

##### INFORMATIONEN VOR OPERATION

Grund des Besuchs: Erstvorstellung; Akute Pankreatitis, Bauchspeicheldrüsenzyste

Datum der Erstdiagnose: 07.04.2031

Aktuelle Verdachtsdiagnose: Lokal fortgeschrittenes duktales Adenokarzinom des Pankreas (PDAC)

Diagnose histologisch gesichert: Material: Probenentnahme operativ, Befund: Duktales Adenokarzinom des Pankreas (PDAC)

Ungewollter Gewichtsverlust: 8 kg in 5 Wochen

Verdauung: Anzahl Stuhlgänge pro Tag: 1, Durchfall liegt vor

Ikterus liegt vor: seit 04/2031

Endoskopisch retrograde Cholangiopankreatikographie liegt vor: ERCP-Stents eingelegt

Laborwerte: Carcinoembryonales Antigen (CEA): 7.6 mikrogramm/L: Wert erhöht; Carbohydrat-Antigen 19-9 (CA 19-9): 278.4 U/ml: Wert erhöht; Bilirubin gesamt: 1.69 mg/dl: Wert erhöht; Alkalische Phosphatase (AP): 344.0 U/L: Wert erhöht; Gamma-glutamyl Transferase (GGT): 112.0 U/L: Wert erhöht; Lipase: 101.0 U/L: Wert erhöht

Radiologischer Befund der Verdachtsdiagnose: Duktales Adenokarzinom des Pankreas (PDAC) / maligne Pankreastumoren, Resezierbarkeit des Tumors: Lokal fortgeschritten

Therapieempfehlung: Explorative Laparotomie

##### INFORMATIONEN ZUR OPERATION

Datum der stationären Aufnahme: 18.05.2031

OP-Datum: 19.05.2031

Diagnose (gesichert): Lokal fortgeschrittenes Duktales Adenokarzinom des Pankreas (PDAC)

Art der OP: Pylorusresizierende Pankreaskopfresektion (prWhipple), OP wurde abgebrochen: Grund: Metastasierung, Lokalisation der Metastasen: Lymphknoten (fern); OP-Zugangsmethode: Offene OP

Fremdmaterial vorhanden: Magensonde



Schnellschnitt auffällig: Lymphknotenmetastase eines pankreatobiliären Adenokarzinoms, gemäß der morphologischen Befunde passend zu Manifestationen eines klinisch in Betracht gezogenen Pankreas-askopfkarzinoms

Sonstige Informationen aus der OP: Antibiose nur intraoperativ verabreicht

#### STATIONÄRER VERLAUF

Verlegung nach OP in Aufwachraum am 19.05.2031, dann zeitnahe Verlegung auf Normalstation  
Stationäre antibiotische Therapie: Gabe von Ceftriaxon/Metronidazol i.v. von 18.05.2031 bis 21.05.2031

Folgende Analgetika wurden verabreicht: Nicht steroidale Antirheumatika (NSAID), Opiode p.o., Regionalanästhesie (inkl. Periduralanästhesie (PDA))

Es zeigten sich reizlose Wundverhältnisse

Mobilisation des Patienten war wie vor Operation möglich

Der Kostenaufbau des Patienten erfolgte zeitgerecht

Suffiziente Darmpassage seit 22.05.2031

Sonstige Auffälligkeiten: Aufgrund von positiven aortocavalen Lymphknoten, die in diesem Falle als Fernmetastasen zu werten sind, wurde die Operation nach der Cholezystektomie abgebrochen.

Entlassungsdatum: 24.05.2031

Summary 19

#### *Generated Discharge Summary*

##### Anamnese und Befund:

Die 57-jährige Patientin wurde am 08.03.2039 mit einer akuten Pankreatitis und einer Bauchspeicheldrüsenzyste in unserer Klinik vorgestellt. Die Patientin litt unter Übelkeit, Erbrechen und einem ungewollten Gewichtsverlust von 3 kg innerhalb von 2 Wochen. Ein Ikterus war seit Februar 2039 vorhanden. Die Laborwerte zeigten eine Erhöhung des Bilirubins, der alkalischen Phosphatase, der Gamma-Glutamyl-Transferase, der Amylase und der Lipase. Eine endoskopische retrograde Cholangiopankreatikographie (ERCP) am 14.03.2039 ergab die Einlage eines Gallengangsstents. Der radiologische Befund wies auf ein resektables duktales Adenokarzinom des Pankreas (PDAC) hin.

##### Therapie und Verlauf:

Die Patientin wurde am 31.03.2039 stationär aufgenommen und am 01.04.2039 einer explorativen Laparotomie mit Pylorus-resezierender partieller Pankreatikoduodenektomie (Pylorus-resezierender Whipple) unterzogen. Intraoperativ wurde eine Easy-Flow-Drainage und eine Spüldrainage eingelegt, die am 06.04.2039 und 07.04.2039 entfernt wurden. Postoperativ erhielt die Patientin eine antibiotische Therapie mit Ceftriaxon/Metronidazol und Piperacillin/Tazobactam. Es wurden Opiode und Metoclopramid verabreicht. Die Patientin zeigte reizlose Wundverhältnisse und eine suffiziente Darmpassage seit dem 06.04.2039. Es traten Erbrechen und Übelkeit an den Tagen 1-3 postoperativ auf. Eine Bindehaut-Chemosis, die konservativ behandelt wurde, bildete sich vollständig zurück. Die Patientin wurde am 11.04.2039 entlassen.

#### *EHR Data*

##### ALLGEMEINE INFORMATIONEN

Geschlecht: weiblich

Geburtsdatum: 09.06.1981

Alkoholkonsum: Häufigkeit: Täglich



## INFORMATIONEN VOR OPERATION

Grund des Besuchs: Erstvorstellung; Akute Pankreatitis, Bauchspeicheldrüsenzyste

Datum der Erstdiagnose: 08.03.2039

Aktuelle Verdachtsdiagnose: Resektables duktales Adenokarzinom des Pankreas (PDAC)

[Diagnose histologisch nicht gesichert](#)

Ungewollter Gewichtsverlust: 3 kg in 2 Wochen

Ikterus liegt vor: seit 02/2039

Endoskopisch retrograde Cholangiopankreatikographie liegt vor: Zeitpunkt: 14.03.2039, Anzahl Untersuchungen bisher: 1, ERCP-Stents eingelegt

Übelkeit liegt in letzter Zeit vor

Erbrechen liegt in letzter Zeit vor

Laborwerte: Bilirubin gesamt: 2.51 mg/dl: Wert erhöht; Alkalische Phosphatase (AP): 209.0 U/L: Wert erhöht; Gamma-glutamyl Transferase (GGT): 149.0 U/L: Wert erhöht; Amylase: 309.0 U/L: Wert erhöht; Lipase: 350.0 U/L: Wert erhöht

Präoperative Behandlung: Gallengangsstent

Radiologischer Befund der Verdachtsdiagnose: Duktales Adenokarzinom des Pankreas (PDAC) / maligne Pankreastumoren, [Resezierbarkeit des Tumors: Resektabel](#)

Therapieempfehlung: Explorative Laparotomie, Pylorus resezierende, partielle Pankreatikoduodenektomie (Pylorus-resezierende Whipple)

## INFORMATIONEN ZUR OPERATION

Datum der stationären Aufnahme: 31.03.2039

OP-Datum: 01.04.2039

[Diagnose \(gesichert\): resect. Duktales Adenokarzinom des Pankreas \(PDAC\)](#)

Art der OP: Pylorusresezierende Pankreaskopfresektion (prWhipple), OP-Zugangsmethode: Offene OP

Intraoperative Drainagen: Easy-Flow Drainage: Eingelegt am 01.04.2039, entfernt am 06.04.2039;

Spüldrainage: Eingelegt am 01.04.2039, entfernt am 07.04.2039

[Sonstige Informationen aus der OP: Transfusion gegeben, Blutverlust von 700 ml, Antibiose nur intraoperativ verabreicht, Besonderheiten: Vorliegen aberranter linker Leberarterie aus der Arteria gastrica sinistra](#)

## STATIONÄRER VERLAUF

[Verlegung nach OP in Aufwachraum am 01.04.2039, dann zeitnahe Verlegung auf Normalstation](#)

Stationäre antibiotische Therapie: Gabe von Ceftriaxon/Metronidazol i.v. [von 31.03.2039 bis 05.04.2039](#), Gabe von Piperacillin/Tazobactam i.v. [von 31.03.2039 bis 05.04.2039](#)

Folgende Analgetika wurden verabreicht: Opiode p.o., Opiode i.v.

Weitere Medikation: Gabe von Metoclopramid i.v. am 17.12.2023

Es zeigten sich reizlose Wundverhältnisse

[Mobilisation des Patienten war wie vor Operation möglich](#)

Suffiziente Darmpassage seit 06.04.2039; Erbrechen und Übelkeit an Tag 1-3 postoperativ

[Sonstige Auffälligkeiten: im Aufwachraum die Transfusion von 2 EKs eingeleitet wurde. Ebenso erfolgte bei niedrigem Albumin-Spiegel eine Humanalbumin-Gabe.](#) . Postoperativ zeigte sich bei der Patientin eine Bindehaut-Chemosis, die nach Rücksprache mit den augenärztlichen Kollegen konservativ behandelt wurde und sich zum 6. Postoperativen Tag vollständig zurückbildete

Entlassungsdatum: 11.04.2039

Summary 20

[Generated Discharge Summary](#)

#### Anamnese und Befund:

Der 43-jährige Patient wurde aufgrund einer chronischen Pankreatitis und einer Bauchspeicheldrüsenszyste in unserer Klinik vorgestellt. Die Erstdiagnose erfolgte am 04.02.2054. Der Patient litt unter stark schwankenden Schmerzen im Oberbauch seit vier Wochen, die täglich auftraten und mit Morphin behandelt wurden. Es bestand ein ungewollter Gewichtsverlust von 3 kg in vier Wochen. Der Patient klagte über Übelkeit und Erbrechen. Die Laborwerte zeigten erhöhte Werte für Carcinoembryonales Antigen (CEA) und Carbohydrat-Antigen 19-9 (CA 19-9). Der radiologische Befund ergab ein duktales Adenokarzinom des Pankreas (PDAC) mit lokaler Fortgeschrittenheit.

#### Therapie und Verlauf:

Der Patient wurde am 07.03.2054 stationär aufgenommen und am 08.03.2054 einer explorativen Laparotomie unterzogen. Die Operation erfolgte als Pankreaslinksresektion mit minimalinvasivem Eingriff (MIC). Intraoperativ wurde eine Easy-Flow Drainage und eine Spüldrainage eingelegt, die am 21.03.2054 und 30.03.2054 entfernt wurden. Der Patient erhielt eine Transfusion aufgrund eines Blutverlustes von 700 ml. Postoperativ wurde der Patient auf die Normalstation verlegt und erhielt eine antibiotische Therapie mit Pivmecillin 400mg von 25.03.2054 bis 27.03.2054 aufgrund einer unkomplizierten Zystitis. Der Patient erhielt Analgetika in Form von nicht steroidal Antirheumatika (NSAID), Opiode p.o. und Regionalanästhesie (inkl. Periduralanästhesie (PDA)). Es zeigten sich reizlose Wundverhältnisse, und die Mobilisation des Patienten war wie vor der Operation möglich. Der Patient zeigte eine suffiziente Darmpassage seit 13.03.2054, und Erbrechen und Übelkeit traten ab Tag 1 postoperativ und über den dritten Tag postoperativ hinaus auf. Der Patient wurde am 01.04.2054 entlassen.

#### EHR Data

##### ALLGEMEINE INFORMATIONEN

Geschlecht: männlich

Geburtsdatum: 26.07.1980

Körpergröße: 172 cm, Körpergewicht: 83 kg

Bekannte Vorerkrankungen: Arterielle Hypertonie

Vorliegende Veränderungen: Prostatahyperplasie

Weitere Tumorerkrankungen (nicht am Pankreas)

Vorhergehende abdominelle extrapankreatische OP liegt vor

Familienanamnese: Extrapankreatische Krebserkrankungen liegen vor:

-Art der Erkrankung: Leukämie Brustkrebs, Betroffene Familienmitglieder: Geschwister

Raucherstatus: Ehemaliger Raucher: Aufgehört am: 06/2047, Anzahl Jahre: 40, Zigaretten pro Tag: 15

Alkoholkonsum: Häufigkeit: Aufgehört seit: 11/2053, Häufigkeit Konsum vor Aufhören: Gelegentlicher Konsum, Übermäßiger Alkoholkonsum seit 03/2002 bis 11/2053

##### INFORMATIONEN VOR OPERATION

Grund des Besuchs: Erstvorstellung; Chronische Pankreatitis, Bauchspeicheldrüsenszyste

Datum der Erstdiagnose: 04.02.2054

Aktuelle Verdachtsdiagnose: Lokal fortgeschrittenes duktales Adenokarzinom des Pankreas (PDAC)

Diagnose histologisch nicht gesichert

Ungewollter Gewichtsverlust: 3 kg in 4 Wochen

Chronische Schmerzen liegen vor: Beschwerdedauer: Seit 4 Wochen, Schmerzcharakter: Stark

schwankende Schmerzen, Schmerzverlauf: Rezidivierend, Schmerzfrequenz: Täglich, Schmerzmedikation: Morphin

Verdauung: Anzahl Stuhlgänge pro Tag: 1, Erbrechen liegt vor

Akute Pankreatitis liegt vor

Endoskopisch retrograde Cholangiopankreatikographie liegt vor

Übelkeit liegt in letzter Zeit vor

Laborwerte: Carcinoembryonales Antigen (CEA): 7.6 mikrogramm/L: Wert erhöht; Carbohydrat-Antigen 19-9 (CA 19-9): 278.4 U/ml: Wert erhöht

Radiologischer Befund der Verdachtsdiagnose: Duktales Adenokarzinom des Pankreas (PDAC) / maligne Pankreastumoren, Resezierbarkeit des Tumors: Lokal fortgeschritten

Therapieempfehlung: Explorative Laparotomie

#### INFORMATIONEN ZUR OPERATION

Datum der stationären Aufnahme: 07.03.2054

OP-Datum: 08.03.2054

Diagnose (gesichert): Lokal fortgeschrittenes Duktales Adenokarzinom des Pankreas (PDAC)

Art der OP: Pankreaslinksresektion, OP-Zugangsmethode: Minimalinvasiver Eingriff (MIC)

Intraoperative Drainagen: Easy-Flow Drainage: Eingelegt am 08.03.2054, entfernt am 21.03.2054;

Spüldrainage: Eingelegt am 08.03.2054, entfernt am 30.03.2054

Fremdmaterial vorhanden: Magensonde

Intraoperative Bewertung des Pankreasparenchyms/-gewebes: Textur: Hart, Pankreas nicht lipomatös

Sonstige Informationen aus der OP: Transfusion gegeben, Blutverlust von 700 ml, Antibiose nur intraoperativ verabreicht

#### STATIONÄRER VERLAUF

Verlegung nach OP in Aufwachraum am 08.03.2054, dann zeitnahe Verlegung auf Normalstation

Stationäre antibiotische Therapie: Gabe von Pivmecillin 400mg von 25.03.2054 bis 27.03.2054, Indikation: Unkomplizierte Zystitis

Folgende Analgetika wurden verabreicht: Nicht steroidale Antirheumatika (NSAID), Opiode p.o., Regionalanästhesie (inkl. Periduralanästhesie (PDA))

Weitere Medikation: Gabe von Metoclopramid p.o. von 13.03.2054 bis 27.03.2054

Es zeigten sich reizlose Wundverhältnisse

Mobilisation des Patienten war wie vor Operation möglich

Suffiziente Darmpassage seit 13.03.2054; Erbrechen und Übelkeit ab Tag 1 postoperativ und über den dritten Tag postoperativ hinaus

Entlassungsdatum: 01.04.2054

#### Summary 21

##### Generated Discharge Summary

#### Anamnese und Befund:

Die 57-jährige Patientin wurde aufgrund einer Bauchspeicheldrüsenzyste und Verdachts auf einen Neuroendokrinen Tumor (NET) in unserer Klinik vorgestellt. Die histologische Sicherung erfolgte durch eine Punktion mittels Endoskopischen Ultraschalls, die einen NET bestätigte. Die Patientin litt unter Verdauungsstörungen mit zwei Stuhlgängen pro Tag und Erbrechen. Die Laborwerte zeigten eine verminderte Amylase- und Lipase-Aktivität. Der radiologische Befund ergab ein duktales Adenokarzinom des Pankreas (PDAC) mit einer respektablen Tumorgroße.

#### Therapie und Verlauf:

Die Patientin wurde am 26.06.2033 stationär aufgenommen und am 27.06.2033 einer totalen Pankreatektomie unterzogen. Intraoperativ wurde eine multiviszerales Resektion des Kolons durchgeführt. Postoperativ wurde die Patientin auf die Intermediate Care Station (IMC) verlegt und erhielt eine antibiotische Therapie wegen einer hospital acquired Pneumonie. Es wurden Opiode und Metoclopramid verabreicht. Die Patientin zeigte reizlose Wundverhältnisse und eine suffiziente Darmpassage.  Es trat eine Pneumonie auf, die antibiotisch behandelt wurde. Aufgrund eines Delayed Gastric Emptying (DGE) A (ISGPS 2007) wurde eine Magensonde angelegt. Die Patientin erhielt Blutzucker- und Diabetesschulungen durch spezialisiertes Personal. Die Entlassung erfolgte am 15.07.2033.

## *EHR Data*

### ALLGEMEINE INFORMATIONEN

Geschlecht: weiblich

Geburtsdatum: 22.11.1975

Vorhergehende abdominelle extrapankreatische OP liegt vor

Raucherstatus: Ehemaliger Raucher

Alkoholkonsum: Häufigkeit: Nie

### INFORMATIONEN VOR OPERATION

Grund des Besuchs: Erstvorstellung; Bauchspeicheldrüsenzyste

Aktuelle Verdachtsdiagnose: Neuroendokriner Tumor (NET)

Diagnose histologisch gesichert: Material: Punktion Endoskopischer Ultraschall, Befund: Neuroendokriner Tumor (NET)

Verdauung: Anzahl Stuhlgänge pro Tag: 2, Erbrechen liegt vor

Laborwerte: Amylase: 4.0 U/L: Wert zu niedrig; Lipase: 18.0 U/L: Wert zu niedrig

Radiologischer Befund der Verdachtsdiagnose: Duktales Adenokarzinom des Pankreas (PDAC) / maligne Pankreastumoren, Resezierbarkeit des Tumors: Resektabel

Therapieempfehlung: Pankreaskopfresektion; gegebenenfalls intraoperativ die Entscheidung zu einer totalen Pankreatektomie

### INFORMATIONEN ZUR OPERATION

Datum der stationären Aufnahme: 26.06.2033

OP-Datum: 27.06.2033

Diagnose (gesichert): Neuroendokriner Tumor (NET)

Art der OP: Totale Pankreatektomie, OP-Zugangsmethode: Minimalinvasiver Eingriff (MIC)

OP wurde erweitert: Zusätzliche multiviszerales Resektion des Kolons durchgeführt

Intraoperative Drainagen: Robinson Drainage: Eingelegt am 27.06.2033, entfernt am 05.07.2033

Intraoperative Bewertung des Pankreasparenchyms/-gewebes: Durchmesser: <= 3mm, Dicke: Dick, Pankreas lipomatös

Sonstige Informationen aus der OP: Blutverlust von 0 ml, Antibiose nur intraoperativ verabreicht, Besonderheiten: Um Entscheidung von Pankreaskopfresektion zu Totaler Pankreatektomie

### STATIONÄRER VERLAUF

Verlegung nach OP in Aufwachraum am 27.06.2033, Verlegung auf Intermediate Care Station (IMC)

Stationäre antibiotische Therapie: Gabe von Piperacillin/Tazobactam i.v. von 30.06.2033 bis 06.07.2033, Indikation: Hospital acquired pneumonia

Folgende Analgetika wurden verabreicht: Opiode p.o., patientenkontrollierte Analgesie

Weitere Medikation: Gabe von Metoclopramid i.v. von 07.07.2033 bis 13.07.2033

Bildgebung: CT Schnittbild:

-Indikation: (Erneuter) Infektwertanstieg, Behandlung durch Gabe von Antibiotika

-Befund: Sonstige Befunde: linksseitige Unterlappenatektase mit möglicherweise Infiltration

Weitere Komplikationen: Pneumonie

Es zeigten sich reizlose Wundverhältnisse

Mobilisation des Patienten war wie vor Operation möglich

Der Kostaufbau des Patienten erfolgte zeitgerecht

Suffiziente Darmpassage seit 28.06.2033; Erbrechen und Übelkeit ab Tag 1 postoperativ und über den dritten Tag postoperativ hinaus; Erneute Anlage einer Magensonde notwendig: Delayed Gastric Emptying (DGE) A (ISGPS 2007)

Sonstige Auffälligkeiten: Es erfolgten Blutzucker- und Diabetesschulungen durch spezialisiertes Personal. Eine suffiziente Umsetzung durch die Patientin konnte bei teilweise stark schwankenden Blutzuckerspiegeln noch nicht erreicht werden, sodass hier eine regelmässige Kontrolle und Einstellung durch das Personal weiterhin nötig war

Entlassungsdatum: 15.07.2033

Summary 22

### *Generated Discharge Summary*

Anamnese und Befund:

Die 55-jährige Patientin wurde aufgrund einer Verdachtsdiagnose eines oligometastatischen **dukalen** Adenokarzinoms des Pankreas (PDAC) in unserer Klinik aufgenommen. Die Patientin hatte bereits eine Erstdiagnose von Kolonpolypen und eine positive Familienanamnese für Pankreaserkrankungen und extrapankreatische Krebserkrankungen. Sie litt unter ungewolltem Gewichtsverlust, chronischen Schmerzen, **Verdauungsstörungen**, Übelkeit und Erbrechen. Die Laborwerte zeigten erhöhte Werte für Carcinoembryonales Antigen (CEA), Carbohydrat-Antigen 19-9 (CA 19-9), Alkalische Phosphatase (AP), Gamma-glutamyl Transferase (GGT) und Lipase. Die Patientin hatte bereits eine neoadjuvante Chemotherapie erhalten, die jedoch abgebrochen wurde.

Therapie und Verlauf:

Die Patientin wurde am 13.08.2041 einer explorativen Laparotomie unterzogen, die jedoch aufgrund von Metastasen abgebrochen wurde. Im Anschluss an die Operation wurde die Patientin auf die Normalstation verlegt und erhielt Analgetika in Form von Opioiden p.o. und Regionalanästhesie. Es zeigten sich reizlose Wundverhältnisse, und der Kostaufbau des Patienten erfolgte zeitgerecht. Suffiziente Darmpassage trat ab dem 16.08.2041 auf. Unter analgetischer Therapie mit einliegendem Periduralkatheter trat eine ausgeprägte Hypotonie auf, die jedoch nach Entfernung des Katheters und Umstellung auf orale Medikation mit Hydromorphon und Novalgin beherrscht werden konnte. Der Kreislaufzustand der Patientin stabilisierte sich zunehmend. Die Patientin wurde am 18.08.2041 entlassen.

### *EHR Data*

#### ALLGEMEINE INFORMATIONEN

Geschlecht: weiblich

Geburtsdatum: 13.08.1986

Vorliegende Veränderungen: Kolonpolypen (Erstdiagnose: 10/2040)

Familienanamnese: Pankreaserkrankungen liegen vor:

-Pankreaskarzinom: Betroffene Familienmitglieder: Eltern

Familienanamnese: Extrapankreatische Krebserkrankungen liegen vor:  
-Art der Erkrankung: Darmkrebs, Betroffene Familienmitglieder: Eltern  
Raucherstatus: Raucher: Seit 30 Jahren, Zigaretten pro Tag: 15

#### INFORMATIONEN VOR OPERATION

Grund des Besuchs: Erstvorstellung; Pankreaskarzinom, Bauchspeicheldrüsenzyste  
Datum der Erstdiagnose: 24.01.2041  
Aktuelle Verdachtsdiagnose: Oligomet. duktales Adenokarzinom des Pankreas (PDAC)  
[Diagnose histologisch gesichert](#)  
Ungewollter Gewichtsverlust: 18 kg in 10 Wochen  
Chronische Schmerzen liegen vor: Schmerzcharakter: Mittelstarke Schmerzen, Schmerzverlauf: Rezidivierend, Schmerzfrequenz: Täglich, Schmerzmedikation: Morphin  
Verdauung: Anzahl Stuhlgänge pro Tag: 2, Durchfall liegt vor, Einnahme von Pankreasenzymen: seit 05/2041  
Übelkeit liegt in letzter Zeit vor  
Erbrechen liegt in letzter Zeit vor  
Laborwerte: Carcinoembryonales Antigen (CEA): 5.2 mikrogramm/L: Wert erhöht; Carbohydrat-Antigen 19-9 (CA 19-9): 103.9 U/ml: Wert erhöht; Alkalische Phosphatase (AP): 134.0 U/L: Wert erhöht; Gamma-glutamyl Transferase (GGT): 61.0 U/L: Wert erhöht; Lipase: 19.0 U/L: None  
Präoperative Behandlung: Neoadjuvante Therapie: Chemotherapie, Anzahl Zyklen: 4, Vollständigkeit der Chemotherapie: Abgebrochen  
[Radiologischer Befund der Verdachtsdiagnose: Duktales Adenokarzinom des Pankreas \(PDAC\) / maligne Pankreastumoren, Resezierbarkeit des Tumors: Metastasiert](#)  
Therapieempfehlung: Explorative Laparotomie

#### INFORMATIONEN ZUR OPERATION

Datum der stationären Aufnahme: 12.08.2041  
OP-Datum: 13.08.2041  
Diagnose (gesichert): oligomet. Duktales Adenokarzinom des Pankreas (PDAC)  
Art der OP: Expl + PE, OP wurde abgebrochen: Grund: Metastasierung, Lokalisation der Metastasen:  
OP-Zugangsmethode: Offene OP  
[Intraoperative Bewertung des Pankreasparenchyms/-gewebes: Textur: Hart, Pankreas nicht lipomatös](#)  
[Schnellschnitt auffällig: im Bereich von der Leber-PE Segment IV: spärlicher Nachweis von residuellen Adenokarzinomzellen, ebenso Nachweis von spärlich residualen Adenokarzinomzellen im Bereich der Probeexzision links parailiakaal und am Abgang der Arteria mesenterica inferior, im Bereich von der Probeexzision von Lebersegment VII zeigen sich atypische Zellen, hier jedoch letztlich nicht klar, ob es sich ebenfalls um residuelle Tumormanifestationen handelt oder nicht](#)  
[Sonstige Informationen aus der OP: Antibiose nur intraoperativ verabreicht](#)

#### STATIONÄRER VERLAUF

Verlegung nach OP in Aufwachraum am 12.08.2041, dann zeitnahe Verlegung auf Normalstation  
Folgende Analgetika wurden verabreicht: Opiode p.o., Regionalanästhesie (inkl. Periduralanästhesie (PDA))  
Es zeigten sich reizlose Wundverhältnisse  
Der Kostaufbau des Patienten erfolgte zeitgerecht  
Suffiziente Darmpassage seit 16.08.2041  
Sonstige Auffälligkeiten: Unter analgetischer Therapie mit einliegendem Periduralkatheter bot die Patientin eine ausgeprägte Hypotonie. Der Katheter konnte dann entfernt werden und auf eine orale

Medikation mit Hydromorphon und Novalgin umgestellt werden. Der Kreislaufzustand der Patientin stabilisierte sich zunehmend.

Entlassungsdatum: 18.08.2041

## Summary 23

### Generated Discharge Summary

#### Anamnese und Befund:

Der 46-jährige Patient wurde am 13.02.2033 erstmals in unserer Klinik vorgestellt, nachdem er über chronische Schmerzen im Oberbauch und Übelkeit geklagt hatte. Der Patient hatte in den letzten 14 Wochen einen ungewollten Gewichtsverlust von 15 kg erlitten. Die Laborwerte zeigten erhöhte Werte für Carcinoembryonales Antigen (CEA), Bilirubin, Alkalische Phosphatase (AP), Gamma-glutamyl Transferase (GGT), Amylase und Lipase. Die Endoskopisch retrograde Cholangiopankreatikographie (ERCP) vom 27.01.2021 zeigte eine Gallengangsobstruktion, die durch einen Gallengangsstent behandelt wurde. Der radiologische Befund wies auf ein duktales Adenokarzinom des Pankreas (PDAC) hin, das als resezierbar eingeschätzt wurde.

#### Therapie und Verlauf:

Der Patient wurde am 05.03.2033 stationär aufgenommen und am 06.03.2033 einer explorativen Laparotomie unterzogen. Die Operation wurde aufgrund von Metastasen in der Leber abgebrochen. Intraoperativ wurde eine Robinson-Drainage angelegt, die zeitgerecht entfernt wurde. Der Patient wurde nach der Operation in das Aufwachraum verlegt und dann auf die Normalstation überführt. Die postoperative Schmerztherapie erfolgte mit Opioiden p.o. und patientenkontrollierter Analgesie. Die Wundverhältnisse waren reizlos, die Mobilisation des Patienten war wie vor der Operation möglich. Der Kostaufbau des Patienten erfolgte zeitgerecht und die Darmpassage war seit dem 11.03.2033 suffizient. Der Patient wurde am 12.03.2033 entlassen.

### EHR Data

#### ALLGEMEINE INFORMATIONEN

Geschlecht: männlich

Geburtsdatum: 04.08.1976

Körpergröße: 180 cm, Körpergewicht: 112 kg

Bekannte Vorerkrankungen: Arterielle Hypertonie

Diabetes mellitus liegt vor Insulinpflicht Einnahme orale Antidiabetika

Raucherstatus: Ehemaliger Raucher

#### INFORMATIONEN VOR OPERATION

Grund des Besuchs: Erstvorstellung; Akute Pankreatitis, Bauchspeicheldrüsenzyste

Datum der Erstdiagnose: 13.02.2033

Aktuelle Verdachtsdiagnose: Oligomet. duktales Adenokarzinom des Pankreas (PDAC)

Diagnose histologisch nicht gesichert

Ungewollter Gewichtsverlust: 15 kg in 14 Wochen

Chronische Schmerzen liegen vor: Beschwerdedauer: Seit 2 Wochen, Schmerzcharakter: Leichte Schmerzen, Schmerzverlauf: Rezidivierend, Schmerzfrequenz: Täglich, Schmerzmedikation: Morphin

Akute Pankreatitis liegt vor

Ikterus liegt vor



Endoskopisch retrograde Cholangiopankreatikographie liegt vor: Zeitpunkt: 27.01.2021, Anzahl Untersuchungen bisher: 1, ERCP-Stents eingelegt

Übelkeit liegt in letzter Zeit vor

Erbrechen liegt in letzter Zeit vor

Laborwerte: Carcinoembryonales Antigen (CEA): 4.2 mikrogramm/L: Wert erhöht; Bilirubin gesamt: 1.98 mg/dl: Wert erhöht; Alkalische Phosphatase (AP): 110.0 U/L: Wert erhöht; Gamma-glutamyl Transferase (GGT): 230.0 U/L: Wert erhöht; Amylase: 92.0 U/L: Wert erhöht; Lipase: 258.0 U/L: Wert erhöht

Präoperative Behandlung: Gallengangsstent

Präoperative Gallengangsdrainage gelegt: Art der Drainage: endoskopisch (Metallstent)

Radiologischer Befund der Verdachtsdiagnose: Duktales Adenokarzinom des Pankreas (PDAC) / maligne Pankreastumoren, Resezierbarkeit des Tumors: Resektabel

Sonstige radiologische Befunde: Zeichen einer akuten Pankreatitis

Therapieempfehlung: Explorative Laparotomie, 2-fache Probenentnahme der Leber, intraoperativer Ultraschall der Leber

#### INFORMATIONEN ZUR OPERATION

Datum der stationären Aufnahme: 05.03.2033

OP-Datum: 06.03.2033

Diagnose (gesichert): oligomet. Duktales Adenokarzinom des Pankreas (PDAC)

Art der OP: Expl + PE, OP wurde abgebrochen: Grund: Metastasierung, Lokalisation der Metastasen: Leber; OP-Zugangsmethode: Offene OP

Intraoperative Drainagen: Robinson Drainage wurde zeitgerecht entfernt

Sonstige Informationen aus der OP: Antibiose nur intraoperativ verabreicht

#### STATIONÄRER VERLAUF

Verlegung nach OP in Aufwachraum am 06.03.2033, dann zeitnahe Verlegung auf Normalstation

Folgende Analgetika wurden verabreicht: Opioide p.o., patientenkontrollierte Analgesie

Es zeigten sich reizlose Wundverhältnisse

Mobilisation des Patienten war wie vor Operation möglich

Der Kostaufbau des Patienten erfolgte zeitgerecht

Suffiziente Darmpassage seit 11.03.2033

Entlassungsdatum: 12.03.2033

Summary 24

#### Generated Discharge Summary

Anamnese und Befund:

Der 65-jährige Patient wurde am 23.08.2038 mit einer akuten Pankreatitis und einer Bauchspeicheldrüsenzyste in unsere Klinik aufgenommen. Die Verdachtsdiagnose eines Neuroendokrinen Tumors (NET) wurde aufgrund erhöhter Laborwerte (CA 19-9, Chromogranin A) und eines radiologischen Befundes eines dukalen Adenokarzinoms des Pankreas (PDAC) gestellt. Der Patient hat eine bekannte Arterielle Hypertonie und einen Diabetes mellitus seit 04/2037, für den er insulinpflichtig ist. Zudem liegen Kolonpolypen und ein Darmkrebs vor, der bereits operativ behandelt wurde.

Therapie und Verlauf:

Der Patient wurde am 27.08.2038 einer explorativen Laparotomie, Pankreaslinksresektion mit Splenektomie und Cholezystektomie unterzogen. Intraoperativ wurde ein Easy-Flow Drainage



eingelegt, das am 02.09.2038 entfernt wurde. Der Blutverlust betrug 300 ml, und Antibiotika wurden nur intraoperativ verabreicht. Postoperativ wurde der Patient auf die Normalstation verlegt und erhielt Analgetika in Form von Opioiden p.o. und i.v. sowie Regionalanästhesie. Die Wundverhältnisse waren reizlos, und die Mobilisation des Patienten war wie vor der Operation möglich. Der Kostaufbau erfolgte zeitgerecht, und eine suffiziente Darmpassage trat ab dem 31.08.2038 auf. Es zeigten sich Blutdruckspitzen von systolisch bis zu 200 mmHg, die durch Anpassung der Antihypertensiva und das Neuansetzen von Bisoprolol 5 mg 1-0-0 erfolgreich behandelt werden konnten. Der Patient wurde am 05.09.2038 entlassen.

### *EHR Data*

#### ALLGEMEINE INFORMATIONEN

Geschlecht: männlich

Geburtsdatum: 13.12.1972

Bekannte Vorerkrankungen: Arterielle Hypertonie

Diabetes mellitus liegt vor seit 04/2037, Insulinpflicht seit 05/2037

Vorliegende Veränderungen: Kolonpolypen (Erstdiagnose: 04/2038)

Weitere Tumorerkrankungen (nicht am Pankreas):

-Darmkrebs: Therapie: Operation, Zeitpunkt: 05/2038

Vorhergehende abdominelle extrapankreatische OP liegt vor

#### INFORMATIONEN VOR OPERATION

Grund des Besuchs: Erstvorstellung; Akute Pankreatitis, Bauchspeicheldrüsenzyste

Datum der Erstdiagnose: 23.08.2038

Aktuelle Verdachtsdiagnose: Neuroendokriner Tumor (NET)

[Diagnose histologisch nicht gesichert](#)

Laborwerte: Carbohydrat-Antigen 19-9 (CA 19-9): 41.8 U/ml: Wert erhöht; Chromogranin A: 94.9 mikrogramm/L: Wert erhöht; Bilirubin gesamt: 1.06 mg/dl: Wert erhöht

Radiologischer Befund der Verdachtsdiagnose: Duktales Adenokarzinom des Pankreas (PDAC) / maligne Pankreastumoren, [Resezierbarkeit des Tumors: Resektabel](#)

Therapieempfehlung: Explorative Laparotomie, Pankreaslinksresektion mit Splenektomie, Cholezystektomie

#### INFORMATIONEN ZUR OPERATION

Datum der stationären Aufnahme: 26.08.2038

OP-Datum: 27.08.2038

[Diagnose \(gesichert\): Neuroendokriner Tumor \(NET\)](#)

Art der OP: Pankreaslinksresektion, OP-Zugangsmethode: Offene OP

Intraoperative Drainagen: Easy-Flow Drainage: Eingelegt am 27.08.2038, entfernt am 02.09.2038

[Intraoperative Bewertung des Pankreasparenchyms/-gewebes: Textur: Hart, Pankreas nicht lipomatös](#)

Sonstige Informationen aus der OP: Blutverlust von 300 ml, Antibiose nur intraoperativ verabreicht

#### STATIONÄRER VERLAUF

Verlegung nach OP in Aufwachraum am 27.08.2038, dann zeitnahe Verlegung auf Normalstation

Folgende Analgetika wurden verabreicht: Opiode p.o., Opiode i.v., Regionalanästhesie (inkl. Periduralanästhesie (PDA))

Es zeigten sich reizlose Wundverhältnisse

Mobilisation des Patienten war wie vor Operation möglich

Der Kostaufbau des Patienten erfolgte zeitgerecht

Suffiziente Darmpassage seit 31.08.2038

Sonstige Auffälligkeiten: Blutdruckspitzen von systolisch bis zu 200 mmHg. Anpassung der Antihypertensiva sowie das Neuansetzen von Bisoprolol 5 mg 1-0-0 durchgeführt. Hierunter zeigten sich die Blutdruckspitzen deutlich kupiert.

Entlassungsdatum: 05.09.2038

## Summary 25

### *Generated Discharge Summary*

#### Anamnese und Befund:

Der 62-jährige Patient wurde aufgrund einer Kontrolle ohne Bauchspeicheldrüsenoperation und einer Bauchspeicheldrüsenzyste in unsere Klinik aufgenommen. In der Vorgeschichte fand sich eine vorhergehende abdominelle extrapankreatische OP. Der Patient hat eine positive Familienanamnese für extrapankreatische Krebserkrankungen, insbesondere Lymphome bei seinen Eltern. Der Patient war ehemaliger Raucher und konsumiert Alkohol wöchentlich. Die Laborwerte zeigten erhöhte Werte für CEA, CA 19-9, Bilirubin, AP, GGT und Amylase. Die Verdachtsdiagnose lautete auf Stenose der biliodigestiven Anastomose und Pankreasanastomose. Der Patient hatte bereits eine Pankreaskopfresektion durchgeführt.

#### Therapie und Verlauf:

Der Patient wurde am 12.06.2054 einer explorativen Laparotomie, Adhäsiolyse, Pankreassegmentresektion mit Neuanlage einer Pankreatojejunostomie, Auflösung und Neuanlage der Hepaticojejunostomie und Gallengangsrevision, Umwandlung von single loop zu Roux-Y unterzogen. Intraoperativ wurde eine Blake Drainage angelegt, die zeitgerecht entfernt wurde. Der Blutverlust betrug 300 ml, und Antibiotika wurden nur intraoperativ verabreicht. Postoperativ wurde der Patient auf die Normalstation verlegt und erhielt Opioide p.o. und patientenkontrollierte Analgesie. Die Wundverhältnisse waren reizlos, und die Mobilisation des Patienten war wie vor der Operation möglich. Der Kostaufbau des Patienten erfolgte zeitgerecht, und eine suffiziente Darmpassage konnte ab dem 17.06.2054 festgestellt werden. Der Patient wurde am 18.06.2054 entlassen.

### *EHR Data*

#### ALLGEMEINE INFORMATIONEN

Geschlecht: männlich

Geburtsdatum: 21.02.1992

Vorhergehende abdominelle extrapankreatische OP liegt vor

Familienanamnese: Extrapankreatische Krebserkrankungen liegen vor:

-Art der Erkrankung: Lymphom, Betroffene Familienmitglieder: Eltern, Alter Erkrankungsbeginn: 76

Raucherstatus: Ehemaliger Raucher: Aufgehört am: 01/2052, Anzahl Jahre: 15, Zigaretten pro Tag: 8

Alkoholkonsum: Häufigkeit: Wöchentlich

#### INFORMATIONEN VOR OPERATION

Grund des Besuchs: Kontrolle (ohne Bauchspeicheldrüsenoperation); Bauchspeicheldrüsenzyste

Verdachtsdiagnose: Stenose der biliodigestiven Anastomose und Pankreasanastomose

Histologische Sicherung nicht notwendig

Laborwerte: Carcinoembryonales Antigen (CEA): 4.2 mikrogramm/L: Wert erhöht; Carbohydrat-Antigen 19-9 (CA 19-9): 40.8 U/ml: Wert erhöht; Bilirubin gesamt: 2.43 mg/dl: Wert erhöht; Alkalische Phosphatase (AP): 395.0 U/L: Wert erhöht; Gamma-glutamyl Transferase (GGT): 1808.0 U/L: Wert erhöht; Amylase: 58.0 U/L: Wert erhöht

Vorhergehende Pankreas-OP: Pankreaskopfresektion, Zugang: minimalinvasiv, Datum der OP: 13.02.2052

Therapieempfehlung: Explorative Laparotomie, Neuanlage Hepaticojejunostomie, Neuanlage Pankreatikojejunostomie, Umwandlung nach Roux-Y am 27.11.2023

#### INFORMATIONEN ZUR OPERATION

[Datum der stationären Aufnahme: 08.06.2054](#)

OP-Datum: 12.06.2054

Diagnose (gesichert): Stenose der biliodigestiven Anastomose und Pankreasanastomose bei Z. n. da-Vinci-assistierter pyloruserhaltender Whipple'scher Operation am 28.07.2021 bei intraampullärer papillärer Neoplasie (IAPN) der Ampulla Vateri

Art der OP: Explorative Laparotomie, Adhäsiolyse, Pankreassegmentresektion mit Neuanlage einer Pankreatojejunostomie, Auflösung und Neuanlage der Hepaticojejunostomie und Gallengangsrevision, Umwandlung von single loop zu Roux-Y, OP-Zugangsmethode: Offene OP

Intraoperative Drainagen: Blake Drainage wurde zeitgerecht entfernt

[Intraoperative Bewertung des Pankreasparenchyms/-gewebes: Textur: Hart, Position: Mittig, Durchmesser: > 3mm, Durchmesser in mm: 7, Pankreas nicht lipomatös](#)

Sonstige Informationen aus der OP: Blutverlust von 300 ml, Antibiose nur intraoperativ verabreicht

#### STATIONÄRER VERLAUF

Verlegung nach OP in Aufwachraum am 12.06.2054, dann zeitnahe Verlegung auf Normalstation

Folgende Analgetika wurden verabreicht: Opiode p.o., patientenkontrollierte Analgesie

Es zeigten sich reizlose Wundverhältnisse

Mobilisation des Patienten war wie vor Operation möglich

Der Kostaufbau des Patienten erfolgte zeitgerecht

Suffiziente Darmpassage seit 17.06.2054

Entlassungsdatum: 18.06.2054
